# Supplementary material for: Analysis of NUDIX enzymes across fungi reveals previously unrecognized diversity
Source: Research Square preprint supplement (doi:10.21203/rs.3.rs-6343747/v1), 2025-04-24
Supplement: Supplementary file 1 [file 15b80872e033fec17ab4e0cd.xlsx]

## Sheet: INDEX
S1	List of 183 fungal assemblies
S2	List of protein IDs associated with each new subfamily
S3	Conservation of NUDIX box motif across new subfamilies
S4	New subfamilies vs phyla
S5	Fungal transriptomic dataset
S6	Transcriptomic expression data for canonical NUDIX families
S7	Transcriptomic expression data for new NUDIX subfamilies
S8	List of domains beside NUDIX superfamily in blastp search

## Sheet: S1
assemblyid	Phylum	primary_lifestyle	organism	Class	Order	taxid	species_taxid	name	strain	BUSCO score	Scaffold N50 (Mb)	scaffoldL50	Genome size (Mb)	Pubmed ID	DOI
GCA_000002525.1	Ascomycota	unspecified_saprotroph	Yarrowia lipolytica CLIB122	Saccharomycetes	Saccharomycetales	284591	4952	Yarrowia lipolytica CLIB122	CLIB122	97.9	3.633	3	20.6	15229592
GCA_000002945.2	Ascomycota	nectar_tap_saprotroph	Schizosaccharomyces pombe	Schizosaccharomycetes	Schizosaccharomycetales	4896	4896	Schizosaccharomyces pombe	strain=972h-	95.5	4.54	2	12.6	11859360
GCA_000006255.1	Basidiomycota	wood_saprotroph	Postia placenta Mad-698-R	Agaricomycetes	Polyporales	561896	104341	Postia placenta Mad-698-R	strain=Mad-698-R	93.8	0.323	85	90.9	19193860
GCA_000146045.2	Ascomycota	nectar/tap_saprotroph	Saccharomyces cerevisiae S288C	Saccharomycetes	Saccharomycetales	559292	4932	Saccharomyces cerevisiae S288C	strain=S288C	96.7	0.924	6	12.2	8849441
GCA_000146465.1	Microsporidia	animal_parasite	Encephalitozoon intestinalis ATCC 50506	Microsporidea	Nosematida	876142	58839	Encephalitozoon intestinalis ATCC 50506	strain=ATCC 50506	22.9	0.205	5	2.2	22802648
GCA_000146945.2	Ascomycota	plant_pathogen	Sclerotinia sclerotiorum 1980 UF-70	Leotiomycetes	Helotiales	665079	5180	Sclerotinia sclerotiorum 1980 UF-70	strain=1980	96.9	1.626	9	38.5	21876677
GCA_000149205.2	Ascomycota	unspecified_saprotroph	Aspergillus nidulans FGSC A4	Eurotiomycetes	Eurotiales	227321	162425	Aspergillus nidulans FGSC A4	strain=FGSC A4	98	2.479	5	30.3	16372000
GCA_000149245.3	Basidiomycota	unspecified_saprotroph	Cryptococcus neoformans var. grubii H99	Tremellomycetes	Tremellales	235443	5207	Cryptococcus neoformans var. grubii H99	strain=H99	92.6	1.422	6	18.9	15653466
GCA_000149305.1	Mucoromycota	soil_saprotroph	Rhizopus delemar RA 99-880	Mucoromycetes	Mucorales	246409	936053	Rhizopus delemar RA 99-880	strain=RA 99-880	93.9	3.104	6	46.1	[19578406]
GCA_000149335.2	Ascomycota	soil_saprotroph	Coccidioides immitis RS	Eurotiomycetes	Onygenales	246410	5501	Coccidioides immitis RS	strain=RS	98.9	4.324	3	29	19717792
GCA_000149845.2	Ascomycota	nectar/tap_saprotroph	Schizosaccharomyces japonicus yFS275	Schizosaccharomycetes	Schizosaccharomycetales	402676	4897	Schizosaccharomyces japonicus yFS275	strain=yFS275	92.3	3.867	2	11.7	21511999
GCA_000149925.1	Basidiomycota	plant_pathogen	Puccinia graminis f. sp. tritici CRL 75-36-700-3	Pucciniomycetes	Pucciniales	418459	5297	Puccinia graminis f. sp. tritici CRL 75-36-700-3	strain=CRL 75-36-700-3	85.8	0.965	30	88.7	21536894
GCA_000150675.2	Ascomycota	plant_pathogen	Verticillium dahliae VdLs,17	Sordariomycetes	Glomerellales	498257	27337	Verticillium dahliae VdLs,17	strain=VdLs,17	91.7	1.274	9	33.9	21829347
GCA_000151295.1	Blastocladiomycota	soil_saprotroph	Allomyces macrogynus ATCC 38327	Blastocladiomycetes	Blastocladiales	578462	28583	Allomyces macrogynus ATCC 38327	strain=ATCC 38327	83.2	1.115	17	57.1	23548000, 24710297
GCA_000151645.1	Ascomycota	ectomycorrhizal	Tuber melanosporum	Ascomycota class incertae sedis	Ascomycota order incertae sedis	39416	39416	Tuber melanosporum	strain=Mel28	95.2	0.639	60	124.9	20348908
GCA_000167675.2	Ascomycota	mycoparasite	Trichoderma reesei QM6a	Sordariomycetes	Hypocreales	431241	51453	Trichoderma reesei QM6a	strain=QM6a	99	1.22	9	33.4	18454138
GCA_000181695.1	Basidiomycota	soil_saprotroph	Malassezia globosa CBS 7966	Malasseziomycetes	Malasseziales	425265	76773	Malassezia globosa CBS 7966	strain=CBS 7966	84.5	0.655	5	9	18000048
GCA_000182565.2	Chytridiomycota	pollen_saprotroph	Spizellomyces punctatus DAOM BR117	Spizellomycetes	Spizellomycetales	645134	109760	Spizellomyces punctatus DAOM BR117	strain=DAOM BR117	90.4	1.466	7	24.1	24710297
GCA_000182895.1	Basidiomycota	soil_saprotroph	Coprinopsis cinerea okayama7#130	Agaricomycetes	Agaricales	240176	5346	Coprinopsis cinerea okayama7#130	okayama7#130	92.8	3.468	5	36.2	20547848
GCA_000182965.3	Ascomycota	nectar/tap_saprotroph	Candida albicans SC5314	Saccharomycetes	Saccharomycetales	237561	5476	Candida albicans SC5314	SC5314	95.7	2.232	3	14.3	12712197
GCA_000192795.1	Microsporidia	animal_parasite	Vavraia culicis subsp, floridensis	Microsporidea	Glugeida	948595	103449	Vavraia culicis subsp, floridensis	strain=floridensis	19.1	0.094	21	6.1		10.1186/gb-2013-14-9-r97
GCA_000203795.1	Chytridiomycota	animal_parasite	Batrachochytrium dendrobatidis JAM81	Rhizophydiomycetes	Rhizophydiales	684364	109871	Batrachochytrium dendrobatidis JAM81	strain=JAM81	88.3	1.484	6	24.3	26300319
GCA_000204055.1	Basidiomycota	plant_pathogen	Melampsora larici-populina 98AG31	Pucciniomycetes	Pucciniales	747676	203908	Melampsora larici-populina 98AG31	strain=98AG31	87.5	1.146	27	101.1	24950717, 24646409
GCA_000209485.1	Microsporidia	animal_parasite	Enterocytozoon bieneusi H348	Microsporidea	Nosematida	481877	31281	Enterocytozoon bieneusi H348	strain=H348	13.1	0.002	136	3.9	21536894
GCA_000218685.1	Basidiomycota	wood_saprotroph	Serpula lacrymans var, lacrymans S7,9	Agaricomycetes	Boletales	578457	85982	Serpula lacrymans var, lacrymans S7,9	strain=S7,9	96.2	2.944	6	42.8	19132089
GCA_000219625.1	Ascomycota	plant_pathogen	Zymoseptoria tritici IPO323	Dothideomycetes	Capnodiales	336722	1047171	Zymoseptoria tritici IPO323	strain=IPO323	99.3	2.675	6	39.7	21764756
GCA_000225545.1	Ascomycota	animal_parasite	Arthrobotrys oligospora ATCC 24927	Orbiliomycetes	Orbiliales	756982	13349	Arthrobotrys oligospora ATCC 24927	ATCC 24927	98	2.037	8	40.1	21994252
GCA_000230595.3	Microsporidia	animal_parasite	Edhazardia aedis USNM 41457	Microsporidea	Amblyosporida	1003232	70536	Edhazardia aedis USNM 41457	strain=USNM 41457	18.5	0.434	35	51.3	21909256
GCA_000230625.1	Ascomycota	animal_parasite	Exophiala dermatitidis NIH/UT8656	Eurotiomycetes	Chaetothyriales	858893	5970	Exophiala dermatitidis NIH/UT8656	NIH/UT8656	98.9	3.624	4	26.4	26300319
GCA_000231115.1	Microsporidia	animal_parasite	Vittaforma corneae ATCC 50505	Microsporidea	Nosematida	993615	42399	Vittaforma corneae ATCC 50505	strain=ATCC 50505	15.7	0.115	9	3.2	28348446
GCA_000250985.1	Microsporidia	animal_parasite	Nematocida parisii ERTm1	Microsporidea	Ovavesiculida	881290	586133	Nematocida parisii ERTm1	strain=ERTm1	19.7	0.65	3	4.1	12425527
GCA_000277815.3	Microsporidia	animal_parasite	Encephalitozoon hellem ATCC 50504	Microsporidea	Nosematida	907965	27973	Encephalitozoon hellem ATCC 50504	strain=ATCC 50504	23.3	0.2	6	2.3	22813931
GCA_000280035.2	Microsporidia	animal_parasite	Encephalitozoon romaleae SJ-2008	Microsporidea	Nosematida	1178016	571949	Encephalitozoon romaleae SJ-2008	strain=SJ-2008	23	0.195	6	2.2	22802648
GCA_000292625.1	Basidiomycota	wood_saprotroph	Dacryopinax primogenitus	Dacrymycetes	Dacrymycetales	1858805	1858805	Dacryopinax primogenitus	strain=DJM-731 SS1	93.7	1.233	10	29.5	22802648
GCA_000316135.1	Microsporidia	animal_parasite	Trachipleistophora hominis	Microsporidea	Glugeida	72359	72359	Trachipleistophora hominis		16.2	0.05	46	8.5	27127213
GCA_000328475.2	Basidiomycota	plant_pathogen	Ustilago maydis 521	Ustilaginomycetes	Ustilaginales	5270	5270	Ustilago maydis 521	521	97.7	0.885	7	19.7	23133373
GCA_000383075.1	Microsporidia	animal_parasite	Nosema bombycis CQ1	Microsporidea	Nosematida	578461	27978	Nosema bombycis CQ1	strain=CQ1	18.2	0.057	47	15.7	17080091
GCA_000385875.2	Microsporidia	animal_parasite	Anncaliia algerae PRA339	Microsporidea	Neopereziida	1288291	723287	Anncaliia algerae PRA339	strain=PRA339	16.6	0.072	36	12.2	23496955
GCA_000400465.1	Basidiomycota	unspecified_saprotroph	Wallemia ichthyophaga EXF-994	Wallemiomycetes	Wallemiales	1299270	245174	Wallemia ichthyophaga EXF-994	strain=EXF-994	89.5	0.437	9	9.7	24967735
GCA_000439145.3	Glomeromycota	arbuscular_mycorrhizal	Rhizophagus irregularis DAOM 181602=DAOM 197198	Glomeromycetes	Glomerales	747089	588596	Rhizophagus irregularis DAOM 181602=DAOM 197198	strain=DAOM 197198	94.7	0.336	129	136.7	24034603
GCA_000442015.1	Rozellomycota	mycoparasite	Rozella allomycis CSF55	Rozellomycetes	Rozellales	988480	281847	Rozella allomycis CSF55	strain=CSF55	60	0.058	52	11.9	[24277808, 29355972]
GCA_000447185.1	Microsporidia	animal_parasite	Nosema apis BRL 01	Microsporidea	Nosematida	1037528	35231	Nosema apis BRL 01	strain=BRL 01	13.9	0.024	90	8.6	23932404
GCA_000708205.1	Basidiomycota	plant_pathogen	Mixia osmundae IAM 14324	Mixiomycetes	Mixiales	764103	34349	Mixia osmundae IAM 14324	strain=IAM 14324	87	1.195	5	13.6	23829473
GCA_000711695.1	Basidiomycota	wood_saprotroph	Tilletiaria anomala UBC 951	Exobasidiomycetes	Georgefischeriales	1037660	5281	Tilletiaria anomala UBC 951	strain=UBC 951	88.2	0.127	43	18.7	24372469
GCA_000738915.1	Microsporidia	animal_parasite	Nematocida sp, 1 ERTm6	Microsporidea	Ovavesiculida	1138374	1155007	Nematocida sp, 1 ERTm6	strain=ERTm6	19.5	0.797	3	4.3	24926052
GCA_000739165.1	Mortierellomycota	soil_saprotroph	Podila verticillata NRRL 6337	Mortierellomycetes	Mortierellales	1069443	78898	Podila verticillata NRRL 6337	strain=NRRL 6337	95.6	2.912	6	41.9	25237020
GCA_000760515.2	Microsporidia	animal_parasite	Mitosporidium daphniae	Microsporidea		1485682	1485682	Mitosporidium daphniae	strain=UGP3	32	0.032	50	5.6	28289537
GCA_000803265.1	Microsporidia	animal_parasite	Ordospora colligata OC4	Microsporidea	Nosematida	1354746	174685	Ordospora colligata OC4	strain=OC4	21.8	0.229	5	2.3		10.1073/pnas.1410442111
GCA_000827485.1	Basidiomycota	ectomycorrhizal	Amanita muscaria Koide BX008	Agaricomycetes	Agaricales	946122	41956	Amanita muscaria Koide BX008	strain=Koide BX008	94.6	0.168	54	40.7	25587016
GCA_000938895.1	Mucoromycota	mycoparasite	Parasitella parasitica	Mucoromycetes	Mucorales	35722	35722	Parasitella parasitica	strain=CBS 412,66 substr, NGI-315 ade-	96.1	0.163	73	44.9	24923322
GCA_000950595.1	Mucoromycota	soil_saprotroph	Mucor ambiguus	Mucoromycetes	Mucorales	91626	91626	Mucor ambiguus	strain=NBRC 6742	95.4	0.114	111	40.7	[28034347]
GCA_000988165.1	Microsporidia	animal_parasite	Nosema ceranae	Microsporidea	Nosematida	40302	40302	Nosema ceranae	strain=PA08 1199	21.8	0.043	35	5.7		https://www.ncbi.nlm.nih.gov/bioproject/275080
GCA_001432165.1	Microsporidia	animal_parasite	Pseudoloma neurophilia	Microsporidea	Glugeida	146866	146866	Pseudoloma neurophilia	strain=MK1	10.7	0.006	182	5.2	25914091
GCA_001477545.1	Ascomycota	animal_parasite	Pneumocystis carinii B80	Pneumocystomycetes	Pneumocystidales	1408658	4754	Pneumocystis carinii B80	strain=B80	89.7	0.465	7	7.7	27230544
GCA_001566745.1	Entomophthoromycota	animal_parasite	Conidiobolus coronatus NRRL 28638	Entomophthoromycetes	Entomophthorales	796925	34488	Conidiobolus coronatus NRRL 28638	strain=NRRL 28638	78.6	0.102	113	39.9	23392351
GCA_001574975.1	Monoblepharomycota	litter_saprotroph	Gonapodya prolifera JEL478	Monoblepharidomycetes	Monoblepharidales	1344416	1123529	Gonapodya prolifera JEL478	strain=JEL478	76.6	0.347	42	48.8	25977457
GCA_001638985.2	Mucoromycota	dung_saprotroph	Phycomyces blakesleeanus NRRL 1555(-)	Mucoromycetes	Mucorales	763407	4837	Phycomyces blakesleeanus NRRL 1555(-)	strain=NRRL 1555(-)	96.9	1.516	11	53.9		10.1007/s00253-019-09983-w
GCA_001642395.1	Microsporidia	animal_parasite	Nematocida displodere	Microsporidea	Ovavesiculida	1805483	1805483	Nematocida displodere	strain=JUm2807	21.2	0.441	3	3.1	[27238284]
GCA_001642415.1	Microsporidia	animal_parasite	Nematocida sp, ERTm5	Microsporidea	Ovavesiculida	1805481	1805481	Nematocida sp, ERTm5	strain=ERTm5	20.4	0.099	15	4.4	27362540
GCA_001651415.1	Mortierellomycota	soil_saprotroph	Linnemannia elongata AG-77	Mortierellomycetes	Mortierellales	1314771	310910	Linnemannia elongata AG-77	strain=AG-77	96.6	0.517	31	49.9		10.1371/journal.ppat.1011225
GCA_001683725.1	Mucoromycota	litter_saprotroph	Choanephora cucurbitarum	Mucoromycetes	Mucorales	101091	101091	Choanephora cucurbitarum	strain=KUS-F28377	94.2	0.028	322	29.1	[28076891]
GCA_001875675.1	Microsporidia	protistan_parasite	Amphiamblys sp, WSBS2006	Rudimicrosporea	Metchnikovellida	1866961	1866961	Amphiamblys sp, WSBS2006		19.4	0.012	114	5.6	[30173631, 28091548, 30699769, 25522548, 30731832, 24049494, 30812839, 30812878, 1260541, 4215, 1201519, 5584627, 5956921, 13281494]
GCA_001929475.1	Ascomycota	plant_pathogen	Neolecta irregularis DAH-3	Neolectomycetes	Neolectales	1198029	48691	Neolecta irregularis DAH-3	strain=DAH-3	83.1	0.017	212	14.2		10.1093/gbe/evw235
GCA_001953115.1	Kickxellomycota	animal_endosymbiont	Smittium mucronatum	Harpellomycetes	Harpellales	133383	133383	Smittium mucronatum	strain=ALG-7-W6	66.6	0.023	1304	102.4		10.1038/s42003-021-01799-7
GCA_001969505.1	Kickxellomycota	animal_endosymbiont	Zancudomyces culisetae	Harpellomycetes	Harpellales	1213189	1213189	Zancudomyces culisetae	strain=COL-18-3	67.8	0.026	323	28.7	24027350	10.1093/molbev/msw126
GCA_001970855.1	Kickxellomycota	animal_endosymbiont	Smittium culicis	Harpellomycetes	Harpellales	133412	133412	Smittium culicis	strain=GSMNP	70.5	0.02	1182	77.1	15689432	10.1093/molbev/msw126
GCA_002081675.1	Microsporidia	animal_parasite	Enterocytozoon hepatopenaei	Microsporidea	Nosematida	646526	646526	Enterocytozoon hepatopenaei	strain=TH1	13.1	0.125	10	3.3	24027350	10.1093/molbev/msw126
GCA_002087885.1	Microsporidia	animal_parasite	Hepatospora eriocheir	Microsporidea	Nosematida	1081669	1081669	Hepatospora eriocheir	strain=GB1	10.1	0.017	78	4.6		10.1111/1462-2920.13734
GCA_002087915.1	Microsporidia	animal_parasite	Enterospora canceri	Microsporidea	Nosematida	1081671	1081671	Enterospora canceri	strain=GB1	13.3	0.027	33	3.1		10.1111/1462-2920.13734
GCA_002102555.1	Blastocladiomycota	animal_parasite	Catenaria anguillulae PL171	Blastocladiomycetes	Blastocladiales	765915	109876	Catenaria anguillulae PL171	strain=PL171	71.4	0.218	41	41.3		10.1111/1462-2920.13734
GCA_002104895.1	Neocallimastigomycota	animal_endosymbiont	Anaeromyces robustus	Neocallimastigomycetes	Neocallimastigales	1754192	1754192	Anaeromyces robustus	strain=S4	81.5	0.142	158	71.7	32788582
GCA_002104905.1	Basidiobolomycota	unspecified_saprotroph	Basidiobolus meristosporus CBS 931,73	Basidiobolomycetes	Basidiobolales	1314790	423460	Basidiobolus meristosporus CBS 931,73	strain=CBS 931,73	94.6	0.106	272	89.5	26912365
GCA_002104935.1	Mucoromycota	soil_saprotroph	Hesseltinella vesiculosa	Mucoromycetes	Mucorales	101127	101127	Hesseltinella vesiculosa	strain=NRRL 3301	93.8	0.571	14	27.2		10.1038/ng.3859
GCA_002104945.1	Neocallimastigomycota	animal_endosymbiont	Piromyces finnis	Neocallimastigomycetes	Neocallimastigales	1754191	1754191	Piromyces finnis	strain=finn	84.7	0.75	25	56.5	[28481340]	https://data.nal.usda.gov/dataset/comparative-genome-analysis-mucormycosis-causing-strains-clinical-settings-2
GCA_002104975.1	Neocallimastigomycota	animal_endosymbiont	Neocallimastix californiae	Neocallimastigomycetes	Neocallimastigales	1754190	1754190	Neocallimastix californiae	strain=G1	84.7	0.443	134	193	26912365
GCA_002104985.1	Chytridiomycota	litter_saprotroph	Rhizoclosmatium globosum	Chytridiomycetes	Chytridiales	329046	329046	Rhizoclosmatium globosum	strain=JEL800	75.9	0.292	51	57	26912365
GCA_002104995.1	Kickxellomycota	soil_saprotroph	Linderina pennispora	Kickxellomycetes	Kickxellales	61395	61395	Linderina pennispora	strain=ATCC 12442	80.4	0.909	9	26.2	24108616
GCA_002105135.1	Mucoromycota	soil_saprotroph	Syncephalastrum racemosum	Mucoromycetes	Mucorales	13706	13706	Syncephalastrum racemosum	strain=NRRL 2496	93.9	2.374	5	30.7	24027350
GCA_002105155.1	Mortierellomycota	soil_saprotroph	Lobosporangium transversale	Mortierellomycetes	Mortierellales	64571	64571	Lobosporangium transversale	strain=NRRL 3116	95.6	0.673	22	42.8	[28481340]
GCA_002105175.1	Mucoromycota	soil_saprotroph	Absidia repens	Mucoromycetes	Mucorales	90262	90262	Absidia repens	strain=NRRL 1336	96.2	1.295	11	47.4	[28481340]
GCA_002157105.1	Neocallimastigomycota	animal_endosymbiont	Piromyces sp, E2	Neocallimastigomycetes	Neocallimastigales	73868	73868	Piromyces sp, E2	strain=E2	49.8	0.144	143	71	[28481340]	10.1038/ng.3859
GCA_002261195.1	Mucoromycota	soil_saprotroph	Bifiguratus adelaidae	Mucoromycota class incertae sedis	Mucoromycota order incertae sedis	1938954	1938954	Bifiguratus adelaidae	strain=AZ0501	93.9	0.102	44	19.5		10.1007/s00253-019-09983-w
GCA_002705745.1	Kickxellomycota	soil_saprotroph	Coemansia reversa NRRL 1564	Kickxellomycetes	Kickxellales	763665	61392	Coemansia reversa NRRL 1564	strain=NRRL 1564	88.2	0.347	21	21.8	[28876195]	10.1080/00275514.2017.1364958
GCA_002708625.1	Mucoromycota	soil_saprotroph	Rhizopus microsporus ATCC 52813	Mucoromycetes	Mucorales	1340429	58291	Rhizopus microsporus ATCC 52813	strain=ATCC 52813	96	1.118	8	26		10.1093/gbe/evv090
GCA_002794465.1	Rozellomycota	protistan_parasite	Paramicrosporidium saccamoebae	Rozellomycota class incertae sedis	Rozellomycota order incertae sedis	1246581	1246581	Paramicrosporidium saccamoebae	strain=KSL3	54.3	0.07	29	7.2	[27956601]
GCA_003086715.1	Kickxellomycota	animal_endosymbiont	Smittium megazygosporum	Harpellomycetes	Harpellales	133381	133381	Smittium megazygosporum	strain=SC-DP-2	67.3	0.025	441	43.5		10.1007/s00253-019-09983-w
GCA_003086725.1	Kickxellomycota	animal_endosymbiont	Furculomyces boomerangus	Harpellomycetes	Harpellales	61424	61424	Furculomyces boomerangus	strain=AUS-77-4	75.2	0.044	194	28.1	24027350	10.1128/mbio.00636-18
GCA_003086735.1	Kickxellomycota	animal_endosymbiont	Smittium simulii	Harpellomycetes	Harpellales	133385	133385	Smittium simulii	strain=SWE-8-4	68.7	0.084	167	43.9	24027347	10.1128/mbio.00636-18
GCA_003097675.1	Kickxellomycota	animal_endosymbiont	Smittium angustum	Harpellomycetes	Harpellales	133377	133377	Smittium angustum	strain=AUS-126-30	75.6	0.044	187	28	24027350
GCA_003325435.1	Mucoromycota	soil_saprotroph	Rhizopus azygosporus	Mucoromycetes	Mucorales	86630	86630	Rhizopus azygosporus	strain=CBS 357,93	92.7	0.013	957	39	24027350	10.1128/mbio.00636-18
GCA_003547095.1	Glomeromycota	arbuscular_mycorrhizal	Diversispora epigaea	Glomeromycetes	Diversisporales	1348612	1348612	Diversispora epigaea	strain=IT104	92	0.453	109	156.6	[29674435]	10.1534/g3.118.200235
GCA_003549995.1	Glomeromycota	arbuscular_mycorrhizal	Rhizophagus sp, MUCL 43196	Glomeromycetes	Glomerales	1803374	1803374	Rhizophagus sp, MUCL 43196	strain=MUCL 43196	93.9	0.137	269	125.9	[30368822]
GCA_003550305.1	Glomeromycota	arbuscular_mycorrhizal	Glomus cerebriforme	Glomeromycetes	Glomerales	658196	658196	Glomus cerebriforme	strain=DAOM 227022	94.1	0.148	266	136.8	[30636349]
GCA_003550325.1	Glomeromycota	arbuscular_mycorrhizal	Gigaspora rosea	Glomeromycetes	Gigasporales	44941	44941	Gigaspora rosea	strain=DAOM 194757	93.5	0.232	734	567.9	[30636349]	10.1093/gbe/evt120
GCA_003614145.1	Zoopagomycota	mycoparasite	Piptocephalis cylindrospora	Zoopagomycetes	Zoopagales	1907219	1907219	Piptocephalis cylindrospora		42.1	0.011	282	10.7	[30636349]
GCA_003614675.1	Kickxellomycota	mycoparasite	Dimargaris cristalligena	Dimargaritomycetes	Dimargaritales	215637	215637	Dimargaris cristalligena	strain=RSA 468	78.4	0.024	395	30.7	30297742	10.1038/s41564-018-0261-0
GCA_003614705.1	Chytridiomycota	algal_parasite	Blyttiomyces helicus	Chytridiomycetes	Chytridiomycetes order incertae sedis	388810	388810	Blyttiomyces helicus		36.3	0.007	1973	46.5	30297742	10.1038/s41564-018-0261-0
GCA_003614735.1	Zoopagomycota	mycoparasite	Thamnocephalis sphaerospora	Zoopagomycetes	Zoopagales	78915	78915	Thamnocephalis sphaerospora	strain=RSA 1356	65.1	0.023	237	18.2	30297742
GCA_003614755.1	Zoopagomycota	mycoparasite	Syncephalis pseudoplumigaleata	Zoopagomycetes	Zoopagales	1712513	1712513	Syncephalis pseudoplumigaleata	strain=Benny S71-1	49.6	0.006	756	16.3	30297742	10.1038/s41564-018-0261-0
GCA_003615045.1	Chytridiomycota	mycoparasite	Caulochytrium protostelioides	Caulochytriomycetes	Caulochytriales	1555241	1555241	Caulochytrium protostelioides	strain=ATCC 52028	67.7	0.092	68	21.8	30297742	10.1038/s41564-018-0261-0
GCA_003990745.1	Mucoromycota	ectomycorrhizal	Jimgerdemannia flammicorona	Endogonomycetes	Endogonales	994334	994334	Jimgerdemannia flammicorona	strain=GMNB39	69.6	0.011	6348	239.6	30297742
GCA_003990785.1	Mucoromycota	soil_saprotroph	Endogone sp, FLAS-F59071	Endogonomycetes	Endogonales	2340872	2340872	Endogone sp, FLAS-F59071	strain=FLAS-F59071	77.2	0.011	2370	95.6	[30485448]	10.1111/nph.15613
GCA_004000155.1	Microsporidia	animal_parasite	Tubulinosema ratisbonensis	Microsporidea	Neopereziida	291195	291195	Tubulinosema ratisbonensis	strain=Franzen	16.5	0.012	187	7.6	[30485448]
GCA_004325065.1	Microsporidia	animal_parasite	Hamiltosporidium magnivora	Microsporidea	Microsporidea order incertae sedis	148818	148818	Hamiltosporidium magnivora		20	0.01	608	20.7		10.1128/MRA.00077-19
GCA_004325075.1	Microsporidia	animal_parasite	Hamiltosporidium tvaerminnensis	Microsporidea	Microsporidea order incertae sedis	1176355	1176355	Hamiltosporidium tvaerminnensis		20.3	0.012	606	25.2		10.1093/gbe/evz270
GCA_006535955.1	Chytridiomycota	plant_pathogen	Synchytrium endobioticum	Synchytriomycetes	Synchytriales	286115	286115	Synchytrium endobioticum	strain=MB42	74.1	0.044	153	21.5		10.1093/gbe/evz270
GCA_006535965.1	Chytridiomycota	pollen_saprotroph	Spizellomyces sp, 'palustris'	Spizellomycetes	Spizellomycetales	117820	117820	Spizellomyces sp, 'palustris'	strain=CBS 455,65	91.9	0.219	32	22.9	31209237
GCA_006535975.1	Chytridiomycota	unspecified_saprotroph	Chytriomyces confervae	Chytridiomycetes	Chytridiales	246404	246404	Chytriomyces confervae	strain=CBS 675,73	74.8	0.044	205	36	31209237
GCA_006535985.1	Chytridiomycota	plant_pathogen	Synchytrium microbalum	Synchytriomycetes	Synchytriales	1806994	1806994	Synchytrium microbalum	strain=JEL517	78.8	0.519	16	26.2	31209237
GCA_006536005.1	Chytridiomycota	pollen_saprotroph	Powellomyces hirtus	Spizellomycetes	Spizellomycetales	109895	109895	Powellomyces hirtus	strain=CBS 809,83	89.9	0.158	47	26.2	30200892
GCA_009809945.1	Glomeromycota	arbuscular_mycorrhizal	Gigaspora margarita	Glomeromycetes	Gigasporales	4874	4874	Gigaspora margarita	strain=BEG34	93.2	0.327	743	773.1	31209237
GCA_010203745.1	Mucoromycota	soil_saprotroph	Mucor lusitanicus	Mucoromycetes	Mucorales	29924	29924	Mucor lusitanicus	strain=MU402	97.5	4.574	4	36.8		10.1111/1462-2920.14827
GCA_012184305.1	Ascomycota	animal_parasite	Drechslerella brochopaga	Orbiliomycetes	Orbiliales	47238	47238	Drechslerella brochopaga	strain=YMF1,01829	97	0.513	26	35.4		10.1016/j.cub.2019.09.024
GCA_012184315.1	Ascomycota	animal_parasite	Arthrobotrys entomopaga	Orbiliomycetes	Orbiliales	321852	321852	Arthrobotrys entomopaga	strain=CBS642,8	97.7	0.579	23	38.4		10.1016/j.isci.2020.101057
GCA_014805555.1	Microsporidia	animal_parasite	Thelohania contejeani	Microsporidea	Glugeida	164912	164912	Thelohania contejeani		23.2	0.027	106	10.4		10.1016/j.isci.2020.101057
GCA_014805705.1	Microsporidia	animal_parasite	Cucumispora dikerogammari	Microsporidea	Glugeida	658444	658444	Cucumispora dikerogammari	strain=Dv6	11.9	0.01	904	32.4		10.1128/MRA.01346-20.
GCA_014839865.1	Mucoromycota	soil_saprotroph	Apophysomyces ossiformis	Mucoromycetes	Mucorales	679940	679940	Apophysomyces ossiformis	strain=NRRL A-21654	95.9	0.126	80	34.1		10.1128/MRA.01346-20.
GCA_014839935.1	Entomophthoromycota	animal_parasite	Entomophthora muscae	Entomophthoromycetes	Entomophthorales	34485	34485	Entomophthora muscae	strain=Berkeley	67	0.433	818	1228.1
GCA_015039355.1	Basidiomycota	ectomycorrhizal	Ramaria rubella	Agaricomycetes	Gomphales	113071	113071	Ramaria rubella	strain=UT-36052-T	97.7	0.229	137	105.5		10.1101/232140
GCA_015499975.1	Mortierellomycota	soil_saprotroph	Dissophora ornata	Mortierellomycetes	Mortierellales	979620	979620	Dissophora ornata	strain=Z 71	93.9	0.024	467	38.4		10.1038/s41467-020-18795-w
GCA_015499985.1	Mortierellomycota	soil_saprotroph	Haplosporangium gracile	Mortierellomycetes	Mortierellales	2779863	2779863	Haplosporangium gracile	strain=Z 33	96.5	0.036	377	44.9		10.1007/s13225-020-00455-5
GCA_015500005.1	Mortierellomycota	soil_saprotroph	Entomortierella lignicola	Mortierellomycetes	Mortierellales	979712	979712	Entomortierella lignicola	strain=Z 36	93.8	0.019	530	35.3		10.1007/s13225-020-00455-5
GCA_015500155.1	Mortierellomycota	soil_saprotroph	Haplosporangium bisporale	Mortierellomycetes	Mortierellales	1897645	1897645	Haplosporangium bisporale	strain=Z 9	76.6	0.009	1162	39		10.1007/s13225-020-00455-5
GCA_015502445.1	Mortierellomycota	soil_saprotroph	Mortierella sp, GBA35	Mortierellomycetes	Mortierellales	1896188	1896188	Mortierella sp, GBA35	strain=GBA35	93.6	0.035	382	44.8		10.1007/s13225-020-00455-5
GCA_015502455.1	Mortierellomycota	soil_saprotroph	Mortierella sp, AM989	Mortierellomycetes	Mortierellales	1896186	1896186	Mortierella sp, AM989	strain=AM989	95.6	0.029	404	40.2		10.1007/s13225-020-00455-5
GCA_015502465.1	Mortierellomycota	soil_saprotroph	Mortierella sp, 14UC	Mortierellomycetes	Mortierellales	1896178	1896178	Mortierella sp, 14UC	strain=14UC	94.8	0.04	341	45.2		10.1007/s13225-020-00455-5
GCA_015502475.1	Mortierellomycota	soil_saprotroph	Mortierella sp, AD031	Mortierellomycetes	Mortierellales	1896182	1896182	Mortierella sp, AD031	strain=AD031	93.5	0.037	364	44.8		10.1007/s13225-020-00455-5
GCA_015502485.1	Mortierellomycota	soil_saprotroph	Mortierella sp, GBA39	Mortierellomycetes	Mortierellales	1896189	1896189	Mortierella sp, GBA39	strain=GBA39	95.6	0.033	455	50.9		10.1007/s13225-020-00455-5
GCA_015502505.1	Mortierellomycota	soil_saprotroph	Linnemannia schmuckeri	Mortierellomycetes	Mortierellales	64567	64567	Linnemannia schmuckeri	strain=NRRL 6426	94.2	0.026	542	46.1		10.1007/s13225-020-00455-5
GCA_015502575.1	Mortierellomycota	soil_saprotroph	Mortierella sp, AD010	Mortierellomycetes	Mortierellales	1896179	1896179	Mortierella sp, AD010	strain=AD010	94	0.019	581	38.6		10.1007/s13225-020-00455-5
GCA_015529505.1	Mortierellomycota	soil_saprotroph	Haplosporangium sp, Z 11	Mortierellomycetes	Mortierellales	1897648	1897648	Haplosporangium sp, Z 11	strain=Z 11	96.5	0.057	182	33.5		10.1007/s13225-020-00455-5
GCA_015529515.1	Mortierellomycota	soil_saprotroph	Haplosporangium sp, Z 767	Mortierellomycetes	Mortierellales	1897647	1897647	Haplosporangium sp, Z 767	strain=Z 767	96.7	0.06	170	33.5		10.1007/s13225-020-00455-5
GCA_015529795.1	Mortierellomycota	soil_saprotroph	Haplosporangium sp, Z 27	Mortierellomycetes	Mortierellales	1897644	1897644	Haplosporangium sp, Z 27	strain=Z 27	94.6	0.021	515	36.1		10.1007/s13225-020-00455-5
GCA_015679515.1	Mortierellomycota	soil_saprotroph	Mortierella sp, NVP85	Mortierellomycetes	Mortierellales	1896193	1896193	Mortierella sp, NVP85	strain=NVP85	93.1	0.022	548	42.8		10.1007/s13225-020-00455-5
GCA_015679535.1	Mortierellomycota	soil_saprotroph	Podila horticola	Mortierellomycetes	Mortierellales	311239	311239	Podila horticola	strain=CK413	93.3	0.056	222	40.4		10.1007/s13225-020-00455-5
GCA_015679545.1	Mortierellomycota	soil_saprotroph	Mortierella sp, AD094	Mortierellomycetes	Mortierellales	1896185	1896185	Mortierella sp, AD094	strain=AD094	94.8	0.021	609	43.8		10.1007/s13225-020-00455-5
GCA_015679585.1	Mortierellomycota	soil_saprotroph	Entomortierella beljakovae	Mortierellomycetes	Mortierellales	979673	979673	Entomortierella beljakovae	strain=KOD1040	96	0.019	598	37.8		10.1007/s13225-020-00455-5
GCA_015679605.1	Mortierellomycota	soil_saprotroph	Podila epigama	Mortierellomycetes	Mortierellales	979699	979699	Podila epigama	strain=NRRL 5512	90.7	0.016	649	32.9		10.1007/s13225-020-00455-5
GCA_015679695.1	Mortierellomycota	soil_saprotroph	Mortierella sp, AD011	Mortierellomycetes	Mortierellales	1896180	1896180	Mortierella sp, AD011	strain=AD011	93.8	0.019	592	38.6		10.1007/s13225-020-00455-5
GCA_015680625.1	Ascomycota	unspecified_saprotroph	Neurospora crassa OR74A	Sordariomycetes	Sordariales	367110	5141	Neurospora crassa OR74A	strain=OR74A	95.9	6.001	3	41.1		10.1007/s13225-020-00455-5
GCA_015680625.1	Mortierellomycota	soil_saprotroph	Mortierella hygrophila	Mortierellomycetes	Mortierellales	979708	979708	Mortierella hygrophila	strain=NRRL 2591	95.9	0.129	102	46.1		10.1007/s13225-020-00455-5
GCA_015680635.1	Mortierellomycota	soil_saprotroph	Lunasporangiospora selenospora	Mortierellomycetes	Mortierellales	979761	979761	Lunasporangiospora selenospora	strain=KOD1015	87.5	0.008	1396	40.5		10.1007/s13225-020-00455-5
GCA_015698045.1	Glomeromycota	arbuscular_mycorrhizal	Rhizophagus clarus	Glomeromycetes	Glomerales	94130	94130	Rhizophagus clarus	strain=HR1	94.7	1.307	40	146.8		10.1186/s12864-018-4853-0
GCA_015832245.1	Microsporidia	animal_parasite	Nosema granulosis	Microsporidea	Nosematida	83296	83296	Nosema granulosis	strain=Ou3-Ou53	20.7	0.013	187	8.9		10.3389/fmicb.2023.1152586
GCA_015847235.1	Mortierellomycota	soil_saprotroph	Linnemannia zychae	Mortierellomycetes	Mortierellales	979765	979765	Linnemannia zychae	strain=NRRL 2592	96.7	0.121	120	45.7		10.1007/s13225-020-00455-5
GCA_015849295.1	Mortierellomycota	soil_saprotroph	Modicella reniformis	Mortierellomycetes	Mortierellales	1440133	1440133	Modicella reniformis	strain=MES-2147	82.1	0.006	2102	43.6		10.1007/s13225-020-00455-5
GCA_015849325.1	Mortierellomycota	soil_saprotroph	Mortierella antarctica	Mortierellomycetes	Mortierellales	979670	979670	Mortierella antarctica	strain=KOD1229	96.3	0.047	226	35.5		10.1007/s13225-020-00455-5
GCA_015849335.1	Mortierellomycota	soil_saprotroph	Entomortierella chlamydospora	Mortierellomycetes	Mortierellales	101097	101097	Entomortierella chlamydospora	strain=AD033	95.6	0.024	479	39		10.1007/s13225-020-00455-5
GCA_015852385.1	Mortierellomycota	soil_saprotroph	Podila clonocystis	Mortierellomycetes	Mortierellales	979688	979688	Podila clonocystis	strain=AM1000	94.2	0.033	376	41.4		10.1007/s13225-020-00455-5
GCA_015852425.1	Mortierellomycota	soil_saprotroph	Gryganskiella cystojenkinii	Mortierellomycetes	Mortierellales	979690	979690	Gryganskiella cystojenkinii	strain=1230	94.6	0.037	346	42.9		10.1007/s13225-020-00455-5
GCA_015852495.1	Mortierellomycota	soil_saprotroph	Podila epicladia	Mortierellomycetes	Mortierellales	979697	979697	Podila epicladia	strain=KOD1059	92.1	0.031	363	38.1		10.1007/s13225-020-00455-5
GCA_016097715.1	Mucoromycota	soil_saprotroph	Apophysomyces sp, BC1015	Mucoromycetes	Mucorales	2184030	2184030	Apophysomyces sp, BC1015	strain=BC1015	96	0.037	291	37.6
GCA_016097735.1	Mucoromycota	soil_saprotroph	Apophysomyces sp, BC1021	Mucoromycetes	Mucorales	2184031	2184031	Apophysomyces sp, BC1021	strain=BC1021	95.8	0.038	271	35.1
GCA_016097755.1	Mucoromycota	soil_saprotroph	Apophysomyces sp, BC1034	Mucoromycetes	Mucorales	2184029	2184029	Apophysomyces sp, BC1034	strain=BC1034	95.8	0.04	270	37.8
GCA_016097855.1	Mortierellomycota	soil_saprotroph	Linnemannia gamsii	Mortierellomycetes	Mortierellales	64522	64522	Linnemannia gamsii	strain=AD045	95.2	0.033	430	49.3		10.1007/s13225-020-00455-5
GCA_016097895.1	Mortierellomycota	soil_saprotroph	Linnemannia exigua	Mortierellomycetes	Mortierellales	604196	604196	Linnemannia exigua	strain=NRRL 28262	92.4	0.02	732	48.1		10.1007/s13225-020-00455-5
GCA_016097935.1	Mortierellomycota	soil_saprotroph	Dissophora globulifera	Mortierellomycetes	Mortierellales	979702	979702	Dissophora globulifera	strain=REB-010B	95.2	0.037	303	39.2		10.1007/s13225-020-00455-5
GCA_016097945.1	Mortierellomycota	soil_saprotroph	Podila humilis	Mortierellomycetes	Mortierellales	64523	64523	Podila humilis	strain=KOD1050	79.5	0.016	551	29.2		10.1016/j.isci.2022.104840
GCA_016098005.1	Mortierellomycota	soil_saprotroph	Podila minutissima	Mortierellomycetes	Mortierellales	64525	64525	Podila minutissima	strain=AD069	94.2	0.03	389	39.4		10.1007/s13225-020-00455-5
GCA_016098015.1	Mortierellomycota	soil_saprotroph	Gamsiella multidivaricata	Mortierellomycetes	Mortierellales	101098	101098	Gamsiella multidivaricata	strain=NRRL 6456	92.4	0.023	469	36		10.1007/s13225-020-00455-5
GCA_016098025.1	Mortierellomycota	soil_saprotroph	Mortierella sp, AD032	Mortierellomycetes	Mortierellales	1896183	1896183	Mortierella sp, AD032	strain=AD032	93.5	0.027	568	49.3		10.1007/s13225-020-00455-5
GCA_016098035.1	Mortierellomycota	soil_saprotroph	Mortierella sp, GBA30	Mortierellomycetes	Mortierellales	1896187	1896187	Mortierella sp, GBA30	strain=GBA30	95.3	0.051	222	37		10.1007/s13225-020-00455-5
GCA_016098045.1	Mortierellomycota	soil_saprotroph	Mortierella sp, GBA43	Mortierellomycetes	Mortierellales	1896190	1896190	Mortierella sp, GBA43	strain=GBA43	95.1	0.033	343	39.2		10.1007/s13225-020-00455-5
GCA_016098085.1	Mortierellomycota	soil_saprotroph	Mortierella sp, NVP41	Mortierellomycetes	Mortierellales	1896192	1896192	Mortierella sp, NVP41	strain=NVP41	95.2	0.051	266	45.1		10.1007/s13225-020-00455-5
GCA_016098105.1	Mortierellomycota	soil_saprotroph	Actinomortierella wolfii	Mortierellomycetes	Mortierellales	90253	90253	Actinomortierella wolfii	strain=NRRL 6351	96.6	0.094	113	34.2		10.1007/s13225-020-00455-5
GCA_016098155.1	Mortierellomycota	soil_saprotroph	Actinomortierella ambigua	Mortierellomycetes	Mortierellales	1343610	1343610	Actinomortierella ambigua	strain=BC1065	96.6	0.049	243	37.9		10.1007/s13225-020-00455-5
GCA_016098165.1	Mortierellomycota	soil_saprotroph	Mortierella polycephala	Mortierellomycetes	Mortierellales	41804	41804	Mortierella polycephala	strain=KOD948	95	0.032	303	32.6		10.1007/s13225-020-00455-5
GCA_016255985.1	Microsporidia	animal_parasite	Dictyocoela roeselum	Microsporidea	Glugeida	288439	288439	Dictyocoela roeselum		5.7	0.003	247	2.2		10.1007/s13225-020-00455-5
GCA_016256075.1	Microsporidia	animal_parasite	Dictyocoela muelleri	Microsporidea	Glugeida	279532	279532	Dictyocoela muelleri		15.2	0.007	1832	41.9		10.1007/s13225-020-00455-5
GCA_016748015.1	Glomeromycota	lichenized	Geosiphon pyriformis	Archaeosporomycetes	Archaeosporales	50956	50956	Geosiphon pyriformis	strain=uo1	87.9	0.703	57	128.3		10.1016/j.cub.2021.03.032
GCA_016758895.1	Mucoromycota	soil_saprotroph	Umbelopsis vinacea	Umbelopsidomycetes	Umbelopsidales	44442	44442	Umbelopsis vinacea	strain=WA0000051536	95.7	1.328	7	23.2		10.3389/fmicb.2021.636986
GCA_016758905.1	Mucoromycota	soil_saprotroph	Umbelopsis isabellina	Umbelopsidomycetes	Umbelopsidales	91625	91625	Umbelopsis isabellina	strain=WA0000067209	96.6	1.335	7	22.1		10.3389/fmicb.2021.636986
GCA_016758935.1	Mucoromycota	soil_saprotroph	Thamnidium elegans	Mucoromycetes	Mucorales	101142	101142	Thamnidium elegans	strain=WA0000018081	92.1	0.099	91	30.9		10.3389/fmicb.2021.636986
GCA_016758945.1	Mucoromycota	soil_saprotroph	Mucor plumbeus	Mucoromycetes	Mucorales	97098	97098	Mucor plumbeus	strain=CBS 226,32	95.9	0.048	310	48.4		10.3389/fmicb.2021.636986
GCA_016758965.1	Mucoromycota	soil_saprotroph	Mucor circinatus	Mucoromycetes	Mucorales	2054153	2054153	Mucor circinatus	strain=CBS 142,35	95.1	0.117	125	54.2		10.3389/fmicb.2021.636986
GCA_016758985.1	Mucoromycota	soil_saprotroph	Mucor saturninus	Mucoromycetes	Mucorales	64648	64648	Mucor saturninus	strain=WA0000017839	97.5	0.151	72	39.2		10.3389/fmicb.2021.636986
GCA_016906535.1	Basidiomycota	plant_pathogen	Rhizoctonia solani	Agaricomycetes	Cantharellales	456999	456999	Rhizoctonia solani	strain=AG-1 IA	89.3	2.303	7	40.7		10.1099/mgen.0.000948.
GCA_016946835.1	Neocallimastigomycota	animal_endosymbiont	Neocallimastix sp, JGI-2020a	Neocallimastigomycetes	Neocallimastigales	2767002	2767002	Neocallimastix sp, JGI-2020a	strain=sp3	85.8	1.032	61	201		10.1128/mSystems.00002-21
GCA_017911155.1	Olpidiomycota	algal_parasite	Olpidium bornovanus	Olpidiomycetes	Olpidiales	278681	278681	Olpidium bornovanus		27	0.002	4329	28.2		10.1038/s41598-021-82607-4
GCA_019456465.1	Ascomycota	lichenized	Bacidia gigantensis	Lecanoromycetes	Lecanorales	2732470	2732470	Bacidia gigantensis		98.1	1.807	8	33.1		10.1128/MRA.00686-21
GCA_019671135.1	Mortierellomycota	soil_saprotroph	Linnemannia hyalina	Mortierellomycetes	Mortierellales	64524	64524	Linnemannia hyalina	strain=SCG-10	96.2	2.318	9	51.6		10.1007/s13225-020-00455-5
GCA_900079185.1	Mucoromycota	soil_saprotroph	Absidia glauca	Mucoromycetes	Mucorales	4829	4829	Absidia glauca	strain=CBS 101,48 substr, RVII-324 met-	92.6	0.318	41	48.7	[28034347]	27013042
GCA_905067625.1	Ascomycota	plant_pathogen	Blumeria graminis f, sp, triticale	Leotiomycetes	Erysiphales	1689686	34373	Blumeria graminis f, sp, triticale		98.7	15.158	4	141.4		10.3389/fmicb.2022.903024

## Sheet: S2
new_subfamily_A		new_subfamily_B		new_subfamily_C		new_subfamily_D		new_subfamily_E		new_subfamily_F		new_subfamily_G		new_subfamily_H		new_subfamily_I		new_subfamily_J		new_subfamily_K		new_subfamily_L		new_subfamily_M
KAG2195420.1	Mucor saturninus	GES75560.1	Rhizophagus clarus	KAF0435861.1	Gigaspora margarita	KAF0507845.1	Gigaspora margarita	KAG0038302.1	Gryganskiella cystojenkinii	RHZ45831.1	Diversispora epigaea	KAF3921543.1	Arthrobotrys entomopaga	TPX66714.1	Spizellomyces sp. 'palustris'	RIB00718.1	Gigaspora rosea	RIB25119.1	Gigaspora rosea	RGB33553.1	Rhizophagus diaphanus	KAF0370532.1	Gigaspora margarita	CAZ84221.1	Tuber melanosporum
KAF9965773.1	Modicella reniformis	EAA64521.1	Aspergillus nidulans FGSC A4	KAF0458563.1	Gigaspora margarita	CEP17950.1	Parasitella parasitica	ORZ11407.1	Lobosporangium transversale	RHZ48206.1	Diversispora epigaea	KAG0321502.1	Dissophora globulifera	TPX59437.1	Powellomyces hirtus	RIB02300.1	Gigaspora rosea	RIB30583.1	Gigaspora rosea	RGB29190.1	Rhizophagus diaphanus	KAF0559873.1	Gigaspora margarita	EAA35047.1	Neurospora crassa OR74A
RIB28018.1	Gigaspora rosea	EDO65063.1	Neurospora crassa OR74A	KAF0475778.1	Gigaspora margarita	KAF8938139.1	Dissophora ornata	OAQ35324.1	Linnemannia elongata AG-77	RHZ52810.1	Diversispora epigaea	ORY02893.1	Basidiobolus meristosporus CBS 931.73	RKP38217.1	Dimargaris cristalligena	RIB08931.1	Gigaspora rosea	RIB13389.1	Gigaspora rosea	GES98242.1	Rhizophagus clarus	KAF0472336.1	Gigaspora margarita	EAU87791.2	Coprinopsis cinerea okayama7#130
RIA86840.1	Glomus cerebriforme	EGR44634.1	Trichoderma reesei QM6a	KAF0488302.1	Gigaspora margarita	KAF8946220.1	Haplosporangium gracile	KFH66362.1	Podila verticillata NRRL 6337	RHZ53956.1	Diversispora epigaea	KAF9580603.1	Lunasporangiospora selenospora	RKP27830.1	Syncephalis pseudoplumigaleata	RIB09059.1	Gigaspora rosea	RIB06182.1	Gigaspora rosea	GES97325.1	Rhizophagus clarus	KAF0428202.1	Gigaspora margarita	EAU88706.1	Coprinopsis cinerea okayama7#130
RHZ79063.1	Diversispora epigaea	EGY14148.1	Verticillium dahliae VdLs.17	KAF0506060.1	Gigaspora margarita	KAF8974856.1	Entomortierella lignicola	KAG0378196.1	Mortierella sp. AD032	RHZ56541.1	Diversispora epigaea	KAF9183384.1	Haplosporangium sp. Z 767	RKP13650.1	Piptocephalis cylindrospora	RIB10726.1	Gigaspora rosea	RIB14470.1	Gigaspora rosea	GES92750.1	Rhizophagus clarus	KAF0465058.1	Gigaspora margarita	EED77738.1	Postia placenta Mad-698-R
RGB27146.1	Rhizophagus diaphanus	EHY53245.1	Exophiala dermatitidis NIH/UT8656	KAF0515432.1	Gigaspora margarita	KAF8986817.1	Haplosporangium bisporale	KAG0365582.1	Gamsiella multidivaricata	RHZ57731.1	Diversispora epigaea	KAG9294877.1	Geosiphon pyriformis	RKP07586.1	Thamnocephalis sphaerospora	RIB11048.1	Gigaspora rosea	RIB25345.1	Gigaspora rosea	GES92020.1	Rhizophagus clarus	RHZ88775.1	Diversispora epigaea	EGO18920.1	Serpula lacrymans var. lacrymans S7.9
POG59931.1	Rhizophagus irregularis DAOM 181602=DAOM 197198	KAF0383905.1	Gigaspora margarita	KAF0538419.1	Gigaspora margarita	KAF9108265.1	Mortierella sp. GBA35	KAG0361543.1	Podila minutissima	RHZ57732.1	Diversispora epigaea	CEP14788.1	Parasitella parasitica	RKO92980.1	Blyttiomyces helicus	RIB17998.1	Gigaspora rosea	RIB21046.1	Gigaspora rosea	GES91988.1	Rhizophagus clarus	RIB00854.1	Gigaspora rosea	EGP87138.1	Zymoseptoria tritici IPO323
OUM67959.1	Piromyces sp. E2	KXS21827.1	Gonapodya prolifera JEL478	KAF0558444.1	Gigaspora margarita	KAF9112066.1	Mortierella sp. AM989	KAG0335848.1	Podila humilis	RHZ58156.1	Diversispora epigaea	EGY15390.1	Verticillium dahliae VdLs.17	RIB21180.1	Gigaspora rosea	RIB21056.1	Gigaspora rosea	RIB07154.1	Gigaspora rosea	GES89098.1	Rhizophagus clarus	RIB01217.1	Gigaspora rosea	EGP89732.1	Zymoseptoria tritici IPO323
ORZ05799.1	Absidia repens	OLL25997.1	Neolecta irregularis DAH-3	RIB21053.1	Gigaspora rosea	KAF9135357.1	Mortierella sp. 14UC	KAG0324945.1	Dissophora globulifera	RHZ58196.1	Diversispora epigaea	KAF1806226.1	Mucor lusitanicus	RIA83001.1	Glomus cerebriforme	RIB31001.1	Gigaspora rosea	RIB07991.1	Gigaspora rosea	GES88976.1	Rhizophagus clarus	RIB01350.1	Gigaspora rosea	EGR49375.1	Trichoderma reesei QM6a
ORZ00035.1	Lobosporangium transversale	ORX44356.1	Piromyces finnis	RIB03719.1	Gigaspora rosea	KAF9156063.1	Linnemannia schmuckeri	KAG0280560.1	Linnemannia gamsii	RHZ62880.1	Diversispora epigaea	KAG2234820.1	Thamnidium elegans	RHZ60972.1	Diversispora epigaea	RIB30373.1	Gigaspora rosea	RIB26520.1	Gigaspora rosea	GES88393.1	Rhizophagus clarus	RIB01966.1	Gigaspora rosea	EGX45477.1	Orbilia oligospora ATCC 24927
ORY93619.1	Syncephalastrum racemosum	ORY03354.1	Basidiobolus meristosporus CBS 931.73	KAF0397180.1	Gigaspora margarita	KAF9172532.1	Mortierella sp. AD010	KAG0280256.1	Linnemannia exigua	RHZ63037.1	Diversispora epigaea	KDN39954.1	Tilletiaria anomala UBC 951	RGB38279.1	Rhizophagus diaphanus	RIB29441.1	Gigaspora rosea	RIB26943.1	Gigaspora rosea	GES88282.1	Rhizophagus clarus	RIB06207.1	Gigaspora rosea	EGX52087.1	Orbilia oligospora ATCC 24927
ORX96918.1	Basidiobolus meristosporus CBS 931.73	OZJ03865.1	Bifiguratus adelaidae	KAF0424702.1	Gigaspora margarita	KAF9180642.1	Haplosporangium sp. Z 767	KAG0248672.1	Mortierella polycephala	RHZ66594.1	Diversispora epigaea	KXN66309.1	Conidiobolus coronatus NRRL 28638	RCH97317.1	Rhizopus azygosporus	RIB29429.1	Gigaspora rosea	RIB01860.1	Gigaspora rosea	GES85710.1	Rhizophagus clarus	RIB06613.1	Gigaspora rosea	KAF3905638.1	Drechslerella brochopaga
ORX80410.1	Anaeromyces robustus	RHZ58178.1	Diversispora epigaea	KAF0435871.1	Gigaspora margarita	KAF9180845.1	Haplosporangium sp. Z 11	KAG0226203.1	Mortierella sp. GBA43	RHZ69292.1	Diversispora epigaea	KXN70953.1	Conidiobolus coronatus NRRL 28638	RCH93700.1	Rhizopus azygosporus	RIB29361.1	Gigaspora rosea	RIB04522.1	Gigaspora rosea	GES76789.1	Rhizophagus clarus	RIB08149.1	Gigaspora rosea	KAF3915282.1	Arthrobotrys entomopaga
ORX59299.1	Piromyces finnis	RIA85874.1	Glomus cerebriforme	KAF0488310.1	Gigaspora margarita	KAF9200127.1	Haplosporangium sp. Z 27	KAG0209460.1	Mortierella sp. NVP41	RHZ72504.1	Diversispora epigaea	KXS10512.1	Gonapodya prolifera JEL478	RCH93608.1	Rhizopus azygosporus	RIB29006.1	Gigaspora rosea	RIB05201.1	Gigaspora rosea	GES72436.1	Rhizophagus clarus	RIB10505.1	Gigaspora rosea	KAF3921810.1	Arthrobotrys entomopaga
OBZ88713.1	Choanephora cucurbitarum	RIB02496.1	Gigaspora rosea	KAF0488311.1	Gigaspora margarita	KAF9311268.1	Podila horticola	KAG0205045.1	Mortierella sp. GBA30	RHZ75106.1	Diversispora epigaea	RKO82804.1	Blyttiomyces helicus	QRW19021.1	Rhizoctonia solani	RIB28958.1	Gigaspora rosea	RIB08721.1	Gigaspora rosea			RIB11112.1	Gigaspora rosea	KAF8590731.1	Ramaria rubella
OAQ33531.1	Linnemannia elongata AG-77	KAG4085745.1	Neocallimastix sp. JGI-2020a	KAF0488315.1	Gigaspora margarita	KAF9358093.1	Mortierella sp. AD094	KAG0096117.1	Podila epicladia	RHZ76086.1	Diversispora epigaea	RKP00153.1	Caulochytrium protostelioides	PVZ99281.1	Smittium angustum	RIB28161.1	Gigaspora rosea	RIB09897.1	Gigaspora rosea			RIB17502.1	Gigaspora rosea	KAG8529857.1	Bacidia gigantensis
KFH66668.1	Podila verticillata NRRL 6337	OUM66276.1	Piromyces sp. E2	KAF0505901.1	Gigaspora margarita	KAF9402252.1	Mortierella sp. AD011	KAG0031120.1	Podila clonocystis	RHZ76144.1	Diversispora epigaea	RKP15000.1	Piptocephalis cylindrospora	PVV01849.1	Smittium megazygosporum	RIB28126.1	Gigaspora rosea	RIB13016.1	Gigaspora rosea			RIB23189.1	Gigaspora rosea	KCZ79188.1	Anncaliia algerae PRA339
KAG9300779.1	Geosiphon pyriformis	ORY54420.1	Neocallimastix californiae	KAF0509704.1	Gigaspora margarita	KAF9434301.1	Entomortierella beljakovae	KAG0005566.1	Entomortierella chlamydospora	RHZ77245.1	Diversispora epigaea	RKP24192.1	Syncephalis pseudoplumigaleata	PVU98150.1	Furculomyces boomerangus	RIB27328.1	Gigaspora rosea	RIB14845.1	Gigaspora rosea			RIB24510.1	Gigaspora rosea	KIL64654.1	Amanita muscaria Koide BX008
KAG9067857.1	Linnemannia hyalina	ORY45794.1	Neocallimastix californiae	KAF0509739.1	Gigaspora margarita	KAF9550266.1	Mortierella hygrophila	KAF9983595.1	Mortierella antarctica	RHZ77815.1	Diversispora epigaea	RUP50326.1	Jimgerdemannia flammicorona	PVU92260.1	Smittium megazygosporum	RIB27010.1	Gigaspora rosea	RIB18341.1	Gigaspora rosea			KAF0521499.1	Gigaspora margarita	KIL69849.1	Amanita muscaria Koide BX008
KAG4106590.1	Neocallimastix sp. JGI-2020a	ORX64883.1	Anaeromyces robustus	KAF0514977.1	Gigaspora margarita	KAF9585877.1	Lunasporangiospora selenospora	KAF9941392.1	Modicella reniformis	RHZ78222.1	Diversispora epigaea	TPX35397.1	Synchytrium endobioticum	POG65960.1	Rhizophagus irregularis DAOM 181602=DAOM 197198	RIB26361.1	Gigaspora rosea	RIB18971.1	Gigaspora rosea					PIA17668.1	Coemansia reversa NRRL 1564
KAG2237786.1	Thamnidium elegans			KAF0517998.1	Gigaspora margarita	KAF9912166.1	Linnemannia zychae	KAF9542962.1	Mortierella hygrophila	RHZ78629.1	Diversispora epigaea	TPX56771.1	Powellomyces hirtus	PIA14268.1	Coemansia reversa NRRL 1564	RIB24082.1	Gigaspora rosea	RIB20856.1	Gigaspora rosea					KAG8534195.1	Bacidia gigantensis
KAG2226931.1	Mucor circinatus			KAF0524918.1	Gigaspora margarita	KAF9944486.1	Modicella reniformis	KAF9431289.1	Entomortierella beljakovae	RHZ78630.1	Diversispora epigaea	TPX71608.1	Chytriomyces confervae	PHZ16130.1	Rhizopus microsporus ATCC 52813	RIB23950.1	Gigaspora rosea	RIB23424.1	Gigaspora rosea					EAS33128.3	Coccidioides immitis RS
KAG2204253.1	Mucor plumbeus			KAF0524925.1	Gigaspora margarita	KAF9993632.1	Entomortierella chlamydospora	KAF9402789.1	Mortierella sp. AD011	RHZ82225.1	Diversispora epigaea	TPX73657.1	Chytriomyces confervae	PHZ13949.1	Rhizopus microsporus ATCC 52813	RIB23824.1	Gigaspora rosea	RIB27730.1	Gigaspora rosea
KAG2187955.1	Umbelopsis vinacea			KAF0539426.1	Gigaspora margarita	KAG0032219.1	Podila clonocystis	KAF9357702.1	Mortierella sp. NVP85	RHZ82943.1	Diversispora epigaea	SAM04649.1	Absidia glauca	ORZ15672.1	Absidia repens	RIB23360.1	Gigaspora rosea	RIB27602.1	Gigaspora rosea
KAG0368682.1	Gamsiella multidivaricata			KAF0539427.1	Gigaspora margarita	KAG0056299.1	Gryganskiella cystojenkinii	KAF9349165.1	Mortierella sp. AD094	RHZ83734.1	Diversispora epigaea	EFP79733.1	Puccinia graminis f. sp. tritici CRL 75-36-700-3	ORZ14652.1	Absidia repens	RIB22810.1	Gigaspora rosea	RIB26997.1	Gigaspora rosea
KAG0360185.1	Mortierella sp. AD032			KAF0558212.1	Gigaspora margarita	KAG0097359.1	Podila epicladia	KAF9207314.1	Haplosporangium sp. Z 27	RHZ84765.1	Diversispora epigaea	EGG03792.1	Melampsora larici-populina 98AG31	ORZ13977.1	Absidia repens	RIB22110.1	Gigaspora rosea	RIB26196.1	Gigaspora rosea
KAG0347994.1	Podila minutissima			KAF0560355.1	Gigaspora margarita	KAG0197881.1	Mortierella sp. GBA30	KAF9183985.1	Haplosporangium sp. Z 767	RHZ84767.1	Diversispora epigaea	EIE82438.1	Rhizopus delemar RA 99-880	ORZ13934.1	Lobosporangium transversale	RIB21005.1	Gigaspora rosea	RIB24252.1	Gigaspora rosea
KAG0339840.1	Podila humilis			RIB00728.1	Gigaspora rosea	KAG0223646.1	Actinomortierella wolfii	KAF9182594.1	Haplosporangium sp. Z 11	RHZ85202.1	Diversispora epigaea	KAF8933742.1	Dissophora ornata	ORZ01523.1	Syncephalastrum racemosum	RIB19679.1	Gigaspora rosea	RIB23840.1	Gigaspora rosea
KAG0313971.1	Dissophora globulifera			RIB01310.1	Gigaspora rosea	KAG0230969.1	Mortierella sp. GBA43	KAF9159371.1	Mortierella sp. AD010	RHZ86637.1	Diversispora epigaea	KAF8966708.1	Entomortierella lignicola	ORY86546.1	Neocallimastix californiae	RIB19499.1	Gigaspora rosea	RIB23636.1	Gigaspora rosea
KAG0281536.1	Linnemannia gamsii			RIB26197.1	Gigaspora rosea	KAG0256308.1	Actinomortierella ambigua	KAF9113070.1	Mortierella sp. AM989	RHZ86964.1	Diversispora epigaea	KAF9029298.1	Haplosporangium bisporale	ORY72359.1	Neocallimastix californiae	RIB19385.1	Gigaspora rosea	RIB19211.1	Gigaspora rosea
KAG0261386.1	Actinomortierella ambigua			RIB27014.1	Gigaspora rosea	KAG0264017.1	Mortierella polycephala	KAF9099993.1	Mortierella sp. GBA35	RHZ87345.1	Diversispora epigaea	KAF9114979.1	Mortierella sp. AM989	ORX97120.1	Basidiobolus meristosporus CBS 931.73	RIB18459.1	Gigaspora rosea	RIB18396.1	Gigaspora rosea
KAG0256258.1	Linnemannia exigua			RIB13056.1	Gigaspora rosea	KAG0275988.1	Linnemannia exigua	KAF9082807.1	Mortierella sp. AD031	RHZ87367.1	Diversispora epigaea	KAF9134520.1	Mortierella sp. 14UC	ORX77856.1	Anaeromyces robustus	RIB18406.1	Gigaspora rosea	RIB12577.1	Gigaspora rosea
KAG0248404.1	Mortierella polycephala					KAG0298622.1	Linnemannia gamsii	KAF8978899.1	Entomortierella lignicola	RHZ87385.1	Diversispora epigaea	KAF9175262.1	Mortierella sp. AD010	ORX70909.1	Linderina pennispora	RIB17363.1	Gigaspora rosea	RIB12035.1	Gigaspora rosea
KAG0243950.1	Actinomortierella wolfii					KAG0328178.1	Dissophora globulifera	KAF8952735.1	Haplosporangium bisporale	RHZ88322.1	Diversispora epigaea	KAF9208153.1	Haplosporangium sp. Z 27	ORX51370.1	Piromyces finnis	RIB16302.1	Gigaspora rosea	RIB08396.1	Gigaspora rosea
KAG0237775.1	Mortierella sp. GBA43					KAG0334083.1	Podila humilis	KAF8942747.1	Haplosporangium gracile	RHZ88644.1	Diversispora epigaea	KAF9314233.1	Podila horticola	ORX50876.1	Hesseltinella vesiculosa	RIB15901.1	Gigaspora rosea	RIB05082.1	Gigaspora rosea
KAG0211161.1	Mortierella sp. NVP41					KAG0354906.1	Podila minutissima	KAF8938246.1	Dissophora ornata	RHZ89132.1	Diversispora epigaea	KAF9358399.1	Mortierella sp. AD094	ORX49092.1	Hesseltinella vesiculosa	RIB14356.1	Gigaspora rosea	RIB01644.1	Gigaspora rosea
KAG0200419.1	Mortierella sp. GBA30					KAG0378502.1	Mortierella sp. AD032					KAF9358875.1	Mortierella sp. NVP85	OMJ19873.1	Smittium culicis	RIB13052.1	Gigaspora rosea	RIB01023.1	Gigaspora rosea
KAG0087661.1	Podila epicladia					KAG9065156.1	Linnemannia hyalina					KAF9397815.1	Mortierella sp. AD011	OMH80595.1	Zancudomyces culisetae	RIB13011.1	Gigaspora rosea	RIB00696.1	Gigaspora rosea
KAG0049909.1	Gryganskiella cystojenkinii					KAG9295864.1	Geosiphon pyriformis					KAF9904707.1	Linnemannia zychae	OMH78969.1	Zancudomyces culisetae	RIB10478.1	Gigaspora rosea	RIB00608.1	Gigaspora rosea
KAG0030255.1	Podila clonocystis					KFH62508.1	Podila verticillata NRRL 6337					KAF9990571.1	Mortierella antarctica	OLY78621.1	Smittium mucronatum	RIB10013.1	Gigaspora rosea	RIB19096.1	Gigaspora rosea
KAF9995268.1	Entomortierella chlamydospora					OAQ30095.1	Linnemannia elongata AG-77					KAF9997845.1	Entomortierella chlamydospora	OBZ88024.1	Choanephora cucurbitarum	RIB09628.1	Gigaspora rosea
KAF9978372.1	Mortierella antarctica					ORZ02061.1	Lobosporangium transversale					KAG0003524.1	Modicella reniformis	OBZ82032.1	Choanephora cucurbitarum	RIB08849.1	Gigaspora rosea
KAF9901762.1	Linnemannia zychae					PVU84602.1	Furculomyces boomerangus					KAG0032329.1	Podila clonocystis	OAQ34107.1	Linnemannia elongata AG-77	RIB08038.1	Gigaspora rosea
KAF9578311.1	Lunasporangiospora selenospora					PVV03001.1	Smittium megazygosporum					KAG0056371.1	Gryganskiella cystojenkinii	OAD69653.1	Phycomyces blakesleeanus NRRL 1555(-)	RIB05377.1	Gigaspora rosea
KAF9540530.1	Mortierella hygrophila					PWA03543.1	Smittium angustum					KAG0085121.1	Podila epicladia	KXS18498.1	Gonapodya prolifera JEL478	RIB04899.1	Gigaspora rosea
KAF9433569.1	Entomortierella beljakovae					RHZ64137.1	Diversispora epigaea					KAG0207601.1	Mortierella sp. GBA30	KXS17975.1	Gonapodya prolifera JEL478	RIB04800.1	Gigaspora rosea
KAF9408224.1	Podila epigama					RIB18197.1	Gigaspora rosea					KAG0242131.1	Actinomortierella wolfii	KXN69045.1	Conidiobolus coronatus NRRL 28638	RIB04699.1	Gigaspora rosea
KAF9398084.1	Mortierella sp. AD011					RUP47766.1	Jimgerdemannia flammicorona					KAG0261360.1	Mortierella polycephala	KNC98536.1	Spizellomyces punctatus DAOM BR117	RIB04406.1	Gigaspora rosea
KAF9352848.1	Mortierella sp. NVP85					KAF0507844.1	Gigaspora margarita					KAG0270119.1	Actinomortierella ambigua	KIS68972.1	Ustilago maydis 521	RIB04027.1	Gigaspora rosea
KAF9347857.1	Mortierella sp. AD094					TPX72271.1	Spizellomyces sp. 'palustris'					KAG0283539.1	Linnemannia gamsii	KIL70966.1	Amanita muscaria Koide BX008	RIB02488.1	Gigaspora rosea
KAF9316467.1	Podila horticola					TPX62866.1	Powellomyces hirtus					KAG0346416.1	Podila humilis	KFH66896.1	Podila verticillata NRRL 6337	RIB02434.1	Gigaspora rosea
KAF9203026.1	Haplosporangium sp. Z 27					RKP38283.1	Dimargaris cristalligena					KAG0356516.1	Podila minutissima	KFH64645.1	Podila verticillata NRRL 6337	RIB01668.1	Gigaspora rosea
KAF9195405.1	Haplosporangium sp. Z 11					RKO99357.1	Caulochytrium protostelioides					KAG0358397.1	Gamsiella multidivaricata	KEI40008.1	Mixia osmundae IAM 14324	RIB01341.1	Gigaspora rosea
KAF9186441.1	Haplosporangium sp. Z 767					RKO85042.1	Blyttiomyces helicus					KAG0379447.1	Mortierella sp. AD032	KDN42628.1	Tilletiaria anomala UBC 951	RIB00625.1	Gigaspora rosea
KAF9171008.1	Mortierella sp. AD010					RIA96387.1	Glomus cerebriforme					KAG2201738.1	Mucor saturninus	KAG9302231.1	Geosiphon pyriformis	RIB00485.1	Gigaspora rosea
KAF9151581.1	Linnemannia schmuckeri					RGB24081.1	Rhizophagus diaphanus					KAG2206331.1	Mucor plumbeus	KAG9071908.1	Linnemannia hyalina	RIB01305.1	Gigaspora rosea
KAF9128158.1	Mortierella sp. GBA39					RCH98193.1	Rhizopus azygosporus					KAG2224254.1	Mucor circinatus	KAG8526273.1	Bacidia gigantensis	RIB14929.1	Gigaspora rosea
KAF9125202.1	Mortierella sp. 14UC					POG68840.1	Rhizophagus irregularis DAOM 181602=DAOM 197198					KAG9069385.1	Linnemannia hyalina	KAG5458036.1	Olpidium bornovanus
KAF9113885.1	Mortierella sp. AM989					PIA14195.1	Coemansia reversa NRRL 1564					KEI42605.1	Mixia osmundae IAM 14324	KAG4108695.1	Neocallimastix sp. JGI-2020a
KAF9103965.1	Mortierella sp. GBA35					PHZ12513.1	Rhizopus microsporus ATCC 52813					KFH71328.1	Podila verticillata NRRL 6337	KAG4096997.1	Neocallimastix sp. JGI-2020a
KAF9082422.1	Mortierella sp. AD031					OZJ02125.1	Bifiguratus adelaidae					KIS67928.1	Ustilago maydis 521	KAG2234420.1	Thamnidium elegans
KAF8980040.1	Entomortierella lignicola					ORZ23424.1	Absidia repens					KND04876.1	Spizellomyces punctatus DAOM BR117	KAG2229779.1	Thamnidium elegans
KAF8945732.1	Haplosporangium gracile					ORZ01410.1	Syncephalastrum racemosum					KXN70951.1	Conidiobolus coronatus NRRL 28638	KAG2224446.1	Mucor circinatus
KAF8931695.1	Haplosporangium bisporale					ORX88830.1	Basidiobolus meristosporus CBS 931.73					KXN70959.1	Conidiobolus coronatus NRRL 28638	KAG2213218.1	Mucor plumbeus
KAF8925828.1	Dissophora ornata					ORX70990.1	Linderina pennispora					KXS14881.1	Gonapodya prolifera JEL478	KAG2211721.1	Mucor saturninus
KAF7723412.1	Apophysomyces ossiformis					ORX58676.1	Hesseltinella vesiculosa					OAD69190.1	Phycomyces blakesleeanus NRRL 1555(-)	KAG2203026.1	Mucor saturninus
KAF1798767.1	Mucor lusitanicus					OBZ82911.1	Choanephora cucurbitarum					OAQ24444.1	Linnemannia elongata AG-77	KAG2195587.1	Mucor plumbeus
KAF0520885.1	Gigaspora margarita					OAD78918.1	Phycomyces blakesleeanus NRRL 1555(-)					OMH83047.1	Zancudomyces culisetae	KAG2187578.1	Umbelopsis vinacea
EIE82761.1	Rhizopus delemar RA 99-880					KXN67045.1	Conidiobolus coronatus NRRL 28638					ORZ12928.1	Lobosporangium transversale	KAG2180660.1	Umbelopsis vinacea
SAM09614.1	Absidia glauca					KND01036.1	Spizellomyces punctatus DAOM BR117					PHZ14710.1	Rhizopus microsporus ATCC 52813	KAG2176205.1	Umbelopsis isabellina
CEP10318.1	Parasitella parasitica					KAG8525856.1	Bacidia gigantensis					PIA19727.1	Coemansia reversa NRRL 1564	KAG2174258.1	Umbelopsis isabellina
GES93196.1	Rhizophagus clarus					KAG2231002.1	Thamnidium elegans					PVU87452.1	Smittium megazygosporum	KAG0375685.1	Mortierella sp. AD032
GAN08122.1	Mucor ambiguus					KAG2217193.1	Mucor circinatus					PVU89360.1	Furculomyces boomerangus	KAG0360158.1	Podila minutissima
KAG2173776.1	Umbelopsis isabellina					KAG2205658.1	Mucor saturninus					PVU95587.1	Smittium simulii	KAG0356383.1	Podila minutissima
KAG5456024.1	Olpidium bornovanus					KAG2191789.1	Mucor plumbeus					PVU95588.1	Smittium simulii	KAG0352215.1	Gamsiella multidivaricata
OLY80654.1	Smittium mucronatum					KAG2177336.1	Umbelopsis isabellina					PVV02202.1	Smittium megazygosporum	KAG0341112.1	Podila humilis
OMJ24274.1	Smittium culicis					KAG2175933.1	Umbelopsis vinacea					PVZ97942.1	Smittium angustum	KAG0327969.1	Dissophora globulifera
PVU97352.1	Furculomyces boomerangus					KAG0355481.1	Gamsiella multidivaricata					PWA02841.1	Smittium angustum	KAG0283115.1	Linnemannia gamsii
PWA02167.1	Smittium angustum					KAG0200119.1	Mortierella sp. NVP41					PWA02842.1	Smittium angustum	KAG0274605.1	Linnemannia exigua
RCH80199.1	Rhizopus azygosporus					KAG0190422.1	Apophysomyces sp. BC1034					RKP11153.1	Thamnocephalis sphaerospora	KAG0261497.1	Actinomortierella ambigua
RIB12810.1	Gigaspora rosea					KAG0179942.1	Apophysomyces sp. BC1021					TPX38033.1	Synchytrium microbalum	KAG0248683.1	Mortierella polycephala
TPX55208.1	Powellomyces hirtus					KAG0170618.1	Apophysomyces sp. BC1015					TPX63228.1	Spizellomyces sp. 'palustris'	KAG0242538.1	Actinomortierella wolfii
TPX72220.1	Spizellomyces sp. 'palustris'					KAF9987863.1	Mortierella antarctica					OMJ18060.1	Smittium culicis	KAG0231333.1	Mortierella sp. GBA43
RKO83653.1	Blyttiomyces helicus					KAF9416604.1	Podila epigama					OMJ07958.1	Smittium culicis	KAG0214355.1	Mortierella sp. GBA30
						KAF9137952.1	Mortierella sp. GBA39					OMH81560.1	Zancudomyces culisetae	KAG0091037.1	Podila epicladia
						KAF9083249.1	Mortierella sp. AD031					OMH78979.1	Zancudomyces culisetae	KAG0056851.1	Gryganskiella cystojenkinii
						KAF7754877.1	Entomophthora muscae					OLY79173.1	Smittium mucronatum	KAG0031206.1	Podila clonocystis
						KAF7731625.1	Apophysomyces ossiformis					ESA44409.1	Neurospora crassa OR74A	KAG0004590.1	Entomortierella chlamydospora
						KAF3904235.1	Drechslerella brochopaga					RCH82214.1	Rhizopus azygosporus	KAF9988630.1	Mortierella antarctica
						KAF3902742.1	Arthrobotrys entomopaga					OMJ25518.1	Smittium culicis	KAF9982832.1	Modicella reniformis
						KAF1807386.1	Mucor lusitanicus					OMJ21337.1	Smittium culicis	KAF9903911.1	Linnemannia zychae
						EIE81380.1	Rhizopus delemar RA 99-880					OLY79046.1	Smittium mucronatum	KAF9579475.1	Lunasporangiospora selenospora
						EGY21149.1	Verticillium dahliae VdLs.17					OBZ89211.1	Choanephora cucurbitarum	KAF9577148.1	Lunasporangiospora selenospora
						EGX49510.1	Orbilia oligospora ATCC 24927					KAG0271737.1	Linnemannia exigua	KAF9548556.1	Mortierella hygrophila
						EGR46282.1	Trichoderma reesei QM6a					KAG0246933.1	Mortierella sp. GBA43	KAF9435201.1	Entomortierella beljakovae
						EGF80123.1	Batrachochytrium dendrobatidis JAM81					KAG0213197.1	Mortierella sp. NVP41	KAF9430523.1	Podila epigama
						EDO65364.2	Neurospora crassa OR74A					KAG0166091.1	Apophysomyces sp. BC1015	KAF9380504.1	Mortierella sp. AD011
						EDO00943.1	Sclerotinia sclerotiorum 1980 UF-70					KAF9542595.1	Mortierella hygrophila	KAF9355995.1	Mortierella sp. AD094
						EAS30480.3	Coccidioides immitis RS					KAF9433330.1	Entomortierella beljakovae	KAF9350505.1	Mortierella sp. NVP85
						SAL96329.1	Absidia glauca					KAF9405973.1	Podila epigama	KAF9314628.1	Podila horticola
						CEP19456.1	Parasitella parasitica					KAF9177174.1	Haplosporangium sp. Z 11	KAF9197395.1	Haplosporangium sp. Z 27
						CAZ80945.1	Tuber melanosporum					KAF9153596.1	Linnemannia schmuckeri	KAF9196245.1	Haplosporangium sp. Z 11
						GES77410.1	Rhizophagus clarus					KAF9128871.1	Mortierella sp. GBA39	KAF9195328.1	Haplosporangium sp. Z 767
						GAN06740.1	Mucor ambiguus					KAF9085633.1	Mortierella sp. AD031	KAF9169403.1	Mortierella sp. AD010
						EAA61227.1	Aspergillus nidulans FGSC A4					KAF8933841.1	Haplosporangium gracile	KAF9141759.1	Mortierella sp. GBA39
												GAN09383.1	Mucor ambiguus	KAF9117750.1	Mortierella sp. 14UC
												TPX33185.1	Synchytrium microbalum	KAF9109846.1	Mortierella sp. AM989
												TPX32520.1	Synchytrium microbalum	KAF9088073.1	Mortierella sp. GBA35
												PVU98891.1	Smittium megazygosporum	KAF9083880.1	Mortierella sp. AD031
												OZJ05461.1	Bifiguratus adelaidae	KAF8983591.1	Haplosporangium bisporale
												ORZ20300.1	Absidia repens	KAF8980604.1	Entomortierella lignicola
												ORZ00288.1	Syncephalastrum racemosum	KAF8942870.1	Haplosporangium gracile
												ORY42831.1	Rhizoclosmatium globosum	KAF8933833.1	Dissophora ornata
												ORX74795.1	Linderina pennispora	KAF8927034.1	Haplosporangium bisporale
												ORX43691.1	Hesseltinella vesiculosa	KAF8592048.1	Ramaria rubella
												KXS14576.1	Gonapodya prolifera JEL478	KAF7757897.1	Entomophthora muscae
												KXS13554.1	Gonapodya prolifera JEL478	KAF7740974.1	Entomophthora muscae
												KXN70950.1	Conidiobolus coronatus NRRL 28638	KAF7727442.1	Apophysomyces ossiformis
												KXN70948.1	Conidiobolus coronatus NRRL 28638	KAF3919860.1	Drechslerella brochopaga
												KIL65633.1	Amanita muscaria Koide BX008	KAF1796958.1	Mucor lusitanicus
												KAG8533698.1	Bacidia gigantensis	KAF1796299.1	Mucor lusitanicus
												KAG2188855.1	Umbelopsis vinacea	KAF0514671.1	Gigaspora margarita
												KAG2182450.1	Umbelopsis isabellina	EOR00511.1	Wallemia ichthyophaga EXF-994
												KAF8584080.1	Ramaria rubella	EIE89246.1	Rhizopus delemar RA 99-880
												KAF7730264.1	Apophysomyces ossiformis	EHY54890.1	Exophiala dermatitidis NIH/UT8656
												KAF3913888.1	Drechslerella brochopaga	EGX45672.1	Orbilia oligospora ATCC 24927
												EHY56310.1	Exophiala dermatitidis NIH/UT8656	EGP90633.1	Zymoseptoria tritici IPO323
												EGX48493.1	Orbilia oligospora ATCC 24927	EGO28505.1	Serpula lacrymans var. lacrymans S7.9
												EGR48365.1	Trichoderma reesei QM6a	EGO28497.1	Serpula lacrymans var. lacrymans S7.9
												EGP92777.1	Zymoseptoria tritici IPO323	EGG02051.1	Melampsora larici-populina 98AG31
												EGO21167.1	Serpula lacrymans var. lacrymans S7.9	EGF81180.1	Batrachochytrium dendrobatidis JAM81
												EGF76452.1	Batrachochytrium dendrobatidis JAM81	EFP81234.1	Puccinia graminis f. sp. tritici CRL 75-36-700-3
												EDN95867.1	Sclerotinia sclerotiorum 1980 UF-70	EEB08297.1	Schizosaccharomyces japonicus yFS275
												EAU82378.2	Coprinopsis cinerea okayama7#130	EDP43446.1	Malassezia globosa CBS 7966
												EAS33474.3	Coccidioides immitis RS	EDN95603.1	Sclerotinia sclerotiorum 1980 UF-70
												EAA59087.1	Aspergillus nidulans FGSC A4	EAU93184.2	Coprinopsis cinerea okayama7#130
												SAM03943.1	Absidia glauca	EAA62323.1	Aspergillus nidulans FGSC A4
												CAZ83499.1	Tuber melanosporum	AFR98060.1	Cryptococcus neoformans var. grubii H99
												CAG80452.1	Yarrowia lipolytica CLIB122	SAM06010.1	Absidia glauca
												RKP26045.1	Syncephalis pseudoplumigaleata	SAL98840.1	Absidia glauca
														SAL95659.1	Absidia glauca
														CEP19662.1	Parasitella parasitica
														CEP09866.1	Parasitella parasitica
														CAZ80221.1	Tuber melanosporum
														CAD6505623.1	Blumeria graminis f. sp. triticale
														CAB11203.1	Schizosaccharomyces pombe
														GES82818.1	Rhizophagus clarus
														GAN07348.1	Mucor ambiguus
														GAN03224.1	Mucor ambiguus

## Sheet: S3
Cluster	MutT numbering
			38	39	40	41	42	43	44	45	46	47	48	49	50	51	52	53	54	55	56	57	58	59	60
MutT (PDB 7WW6)			G	x	x	x	x	x	E	x	x	x	x	x	x	x	R	E	L (I/V)	x	E	E	x	G	I (L/V)
new_subfamily_A			G	R	V	I	G	D	E	D	E	L	K	C	A	L	R	E	T	L	E	I	T	G	L
new_subfamily_B		G	S	I	E	P	N	D	K	S	P	L	E	R	A	L	R	E	I	K	E	E	T	G	L
new_subfamily_C		G	S	I	E	E	T	D	K	G	I	F	K	A	A	K	R	E	C	K	E	E	T	S	Y
new_subfamily_D			G	M	L	D	G	S	G	D	F	A	G	K	A	A	E	E	L	K	E	E	C	G	I
new_subfamily_E		G	K	V	E	R	G	L	E	S	I	A	E	S	A	A	R	E	L	Q	E	E	A	F	I
new_subfamily_F	G	G	H	V	E	E	T	D	I	S	T	K	H	A	A	Q	R	E	V	L	E	E	T	G	I
new_subfamily_G			G	P	N	D	P	P	L	H	N	K	I	C	A	I	R	E	T	F	E	E	S	G	V
new_subfamily_H		G	K	R	E	E	G	D	E	D	D	Q	E	T	A	A	R	E	T	L	E	E	I	G	L
new_subfamily_I	G	K	A	I	H	E	K	N	E	N	I	D	V	C	V	I	R	E	C	F	E	E	A	E	I
new_subfamily_J			N	G	H	E	I	L	E	T	E	E	D	A	A	M	R	E	T	L	E	E	S	G	I
new_subfamily_K			G	K	V	E	L	G	E	S	S	I	Q	A	V	L	R	E	T	Q	E	E	T	G	I
new_subfamily_L			G	G	K	K	N	N	E	S	Y	E	Q	C	A	I	R	E	T	K	E	E	T	N	V
new_subfamily_M			G	R	K	D	I	G	E	S	L	E	Q	A	A	I	R	E	T	Y	E	E	T	G	Y

## Sheet: S4
New subfamily	Glomeromycotina	Mortierellomycotina	Mucoromycotina	Ascomycota	Basidiomycota	Blastocladiomycota	Chytridiomycota	Cryptomycota	Microsporidia	Olpidiomycota	Zoopagomycota
new_subfamily_A	8	46	15	0	0	0	7	0	1	1	5
new_subfamily_B	5	0	1	6	0	0	6	0	0	0	1
new_subfamily_C	2	0	0	0	0	0	0	0	0	0	0
new_subfamily_D	8	45	20	11	0	0	6	0	4	0	9
new_subfamily_E	0	36	0	0	0	0	0	0	0	0	0
new_subfamily_F	1	0	0	0	0	0	0	0	0	0	0
new_subfamily_G	1	45	20	14	9	0	11	0	2	0	14
new_subfamily_H	8	44	18	11	13	0	10	0	1	1	15
new_subfamily_I	1	0	0	0	0	0	0	0	0	0	0
new_subfamily_J	1	0	0	0	0	0	0	0	0	0	0
new_subfamily_K	2	0	0	0	0	0	0	0	0	0	0
new_subfamily_L	3	0	0	0	0	0	0	0	0	0	0
new_subfamily_M	0	0	0	9	5	0	0	0	1	0	1
	Mucoromycota
		Subfamilies only with Glomeromycotina species			! Glomeromycotina fungi have many copies of NUDIX coding gene (e.g. 20 or even more!)
		Subfamilies only with Mucoromycota species
		Max value per given subfamily
		Mucoromycota species

## Sheet: S5
Phylum	Organism	NCBI SRA ID	ENA ID	Year of study	Taken from
Mucoromycota	Mucor lusitanicus MU402	SRP195120	PRJNA538888	2019	https://www.ncbi.nlm.nih.gov/sra/SRP195120
	Jimgerdemannia flammicorona AD002	SRP231327	PRJNA460785	2019	https://www.ncbi.nlm.nih.gov/sra/?term=SRP231327
	Umbelopsis isabellina M6-22	SRP058034	PRJNA283160	2015	https://www.ncbi.nlm.nih.gov/sra/?term=SRP058034
	Endogone sp. FLAS-F59071	SRP231328	PRJNA460786	2019	https://www.ncbi.nlm.nih.gov/sra/?term=SRP231328
	Rhizopus microsporus FP469	SRP294167	PRJNA680574	2020	https://doi.org/10.1101/580746
	Rhizopus delemar 99-880	SRP294133	PRJNA680572	2020	https://doi.org/10.1101/580746
Mortierellomycota	Lobosporangium transversale NRRL 3116	SRP190373	PRJNA459692	2019	https://www.ncbi.nlm.nih.gov/sra/?term=SRP190373
	Dissophora ornata	SRP170249	PRJNA500474	2018	https://data.jgi.doe.gov/search?q=SRP170249
	Gamsiella multidivaricata	SRP123765	PRJNA410576	2017	https://data.jgi.doe.gov/search?q=SRP123765
	Linnemannia hyalina	SRP403743	PRJNA830689	2022	NA
	Lunasporangiospora selenospora KOD 1015	SRP293003	PRJNA677636	2020	https://data.jgi.doe.gov/search?q=SRP293003
	Podila minutissima	SRP123799	PRJNA411560	2017	https://data.jgi.doe.gov/search?q=SRP123799
Glomeromycota	Gigaspora rosea DAOM 194757	SRP057297	PRJNA281541	2016	https://doi.org/10.3389/fmicb.2016.00233
	Rhizophagus irregularis DAOM 197198	DRP003319	PRJDB4730	2016	https://doi.org/10.1007/s00572-016-0735-y
	Rhizophagus clarus	DRP003735	PRJDB4082	2017	NA
	Gigaspora margarita	SRP049975	PRJNA267628	2014	https://doi.org/10.1038/ismej.2015.91
Basidiomycota	Coprinopsis cinerea	SRP379287	PRJNA847431	2022	https://doi.org/10.1128/aem.00940-22
	Ustilago maydis	SRP451616	PRJNA998905	2023	https://doi.org/10.3390/jof9111112
	Rhizoctonia solani	SRP338326	PRJNA765484	2022	NA
	Cryptococcus neoformans	SRP439851	PRJNA976751	2024	https://doi.org/10.3389/fcimb.2024.1369301
Ascomycota	Neurospora crassa	SRP423459	PRJNA936826	2023	NA
	Trichoderma reesei	SRP188940	PRJNA528215	2022	NA
	Coccidioides immitis	SRP313022	PRJNA718949	2021	https://doi.org/10.1128/msystems.01404-21
	Orbilia oligospora	SRP390836	PRJNA868176	2022	NA
	Tuber melanosporum	SRP028655	PRJNA214782	2015	https://doi.org/10.1186/s13059-014-0411-5

## Sheet: S6
	Mucoromycota												Mortierellomycota												Glomeromycota								Ascomycota								Basidiomycota
	Mucor lusitanicus MU402		Rhizopus delemar 99-880		Rhizopus microsporus FP469		Jimgerdemannia flammicorona AD002		Umbelopsis isabellina M6-22		Endogone sp. FLAS-F59071		Lobosporangium transversale NRRL 3116		Dissophora ornata		Gamsiella multidivaricata		Linnemannia hyalina		Lunasporangiospora selenospora KOD 1015		Podila minutissima		Gigaspora rosea DAOM 194757		Gigaspora margarita		Rhizophagus irregularis DAOM 197198		Rhizophagus clarus		Trichoderma reesei		Tuber melanosporum		Neurospora crassa		Coccidioides immitis		Orbilia oligospora		Coprinopsis cinerea		Rhizoctonia solani		Ustilago maydis		Cryptococcus neoformans
	protein ID	average TPM	protein ID	average TPM	protein ID	average TPM	protein ID	average TPM	protein ID	average TPM	protein ID	average TPM	protein ID	average TPM	protein ID	average TPM	protein ID	average TPM	protein ID	average TPM	protein ID	average TPM	protein ID	average TPM	protein ID	average TPM	protein ID	average TPM	protein ID	average TPM	protein ID	average TPM	protein ID	average TPM	protein ID	average TPM	protein ID	average TPM	protein ID	average TPM	protein ID	average TPM	protein ID	average TPM	protein ID	average TPM	protein ID	average TPM	protein ID
PF11788	KAF1796424.1	11.838	EIE85673.1	46.8193	PHZ10271.1	92.8022	RUP48588.1	10.3531	KAG2177916.1	22.0205			ORZ07239.1	30.9653	KAF8939779.1	86.1012	KAG0370669.1	40.1963	KAG9068952.1	37.4841	KAF9580667.1	44.0847	KAG0356109.1	17.5732	RIB11738.1	30.074	KAF0445064.1	32.1005	POG70479.1	7.02142	GET04183.1	19.1507	EGR52232.1	107.554	CAZ85574.1	39.5601	EAA29369.1	103.195	EAS28220.3	68.1802	EGX52131.1	52.0644	EAU88407.1	18.44	QRW17885.1	101.74	KIS66509.1	87.5201	AFR93851.1
	KAF1806616.1	47.2043	EIE86459.1	12.8638	PHZ10776.1	1.03244
	KAF1806992.1	8.72283	EIE88236.1	41.6849	PHZ15838.1	2.90007
PF13869			EIE83084.1	18.0296	PHZ14038.1	13.5091	RUP34606.1	91.1793	KAG2186364.1	23.8495	RUS19098.1	17.0013													RIB03030.1	68.211	KAF0496871.1	84.4148	POG67022.1	12.9823	GES89563.1	45.3089	EGR52257.1	61.2837	CAZ79189.1	115.597	EAA28912.1	77.1827	EAS30933.3	59.7754			EGX52610.1		QRW22805.1	127.406	KIS69877.1	50.397	AFR96716.2
			EIE83223.1	20.7924
PF14815	KAF1806156.1	19.9297	EIE85374.1	7.21642	PHZ17244.1	1.62227			KAG2182435.1	1.59623	RUS23022.1	6.62685			KAF8938560.1	1.89583					KAF9581798.1	14.2995	KAG0352044.1	24.3207									EGR45787.1	25.6278			EDO65359.2	2.0522					EFI26765.1		QRW21712.1	20.7099	KIS67901.1	17.3496	AFR92213.2
PF15916	KAF1805752.1	32.5697	EIE77046.1	30.1491	PHZ13795.1	8.02819	RUP46101.1	25.7602	KAG2173091.1	33.4309	RUS19098.1	17.0013	ORZ26740.1	31.0214	KAF8932805.1	12.432	KAG0358456.1	19.1165	KAG9070505.1	15.0409	KAF9541339.1	29.3304	KAG0331394.1	3.16533	RIB21648.1	64.4022	KAF0504544.1	21.3243	POG80091.1	6.17664	GES88298.1	12.921	EGR44165.1	31.6775	CAZ80546.1	64.9793	EAA33463.1	38.9539	EAS35313.3	19.3254	EGX47081.1	65.3415	EAU88445.1	1.31697	QRW26027.1	12.6325	KIS69287.1	28.8784	AFR98096.2
							RUP45624.1	2.90411															KAG0339103.1	10.3443									EGR50732.1	7.08164			ESA42318.1	9.49111					EAU90520.2	3.85685
																																	EGR51839.1	41.6308			ESA42319.1
PF09296			EIE90650.1	13.1492	PHZ09536.1	15.3023	RUP42669.1	57.7807	KAG2178975.1	32.7134	RUS20264.1	8.64789	ORZ19120.1	26.5635					KAG9071324.1	45.7802													EGR46620.1	72.1133	CAZ86310.1	62.8234	EAA28528.2	87.7126	EAS31043.3	14.3278	EGX52692.1	47.8938	EAU91244.1	5.63535	QRW19336.1	52.8403	KIS65814.1	57.3171	AFR96618.1
NUDT1	KAF1797182.1	23.621	EIE91445.1	47.6067	PHZ10060.1	65.4109	RUP47611.1	6.00348	KAG2184905.1	1.45973	RUS13828.1	18.2635	ORZ29035.1	23.2897	KAF8930050.1	41.4954			KAG9066787.1	8.48992			KAG0353753.1	3.76611																	EGX44407.1	85.2415	EAU82922.2	7.08819	QRW26088.1	40.6676	KIS68684.1	35.0679	AFR97363.2
											RUS14723.1	1.57203
NUDT3	KAF1796771.1	63.3425	EIE76289.1	18.4274	PHZ10433.1	35.0687	RUP50694.1	26.7664	KAG2182404.1	31.6572	RUS22089.1	5.49359	ORY99678.1	26.9349	KAF8939791.1	4.27254			KAG9066204.1	69.1048			KAG0355058.1	2.33081	RIB25145.1	14.5535	KAF0374119.1	18.4607	POG62608.1	9.29538	GES78160.1	15.7811	EGR45824.1	47.5305	CAZ80354.1	93.3283	EAA27246.1	40.0698	EAS34079.3	13.9737	EGX47891.1	19.0656	EFI27880.1	1.48387	QRW18241.1	92.9739	KIS71385.1	66.5343
	KAF1799415.1	44.4457	EIE78720.1	217.161	PHZ10826.1	101.508			KAG2182443.1	45.0395																	KAF0519660.1	22.8761
	KAF1800211.1	22.4795	EIE82512.1	90.7096	PHZ10827.1	14.4793			KAG2182488.1	61.7118
	KAF1802987.1	205.774	EIE85894.1	101.162	PHZ12842.1	210.335
	KAF1803382.1	124.508	EIE85895.1	211.247	PHZ11118.1	35.4699
	KAF1803669.1	90.57	EIE88001.1	39.6876
			EIE88692.1	117.977
			EIE90846.1	14.3282
			EIE91864.1	26.569
NUDT5	KAF1798503.1	29.7632			PHZ07935.1	6.39365					RUS14400.1	11.5978	ORZ27024.1	21.9983					KAG9071189.1	2.02113	KAF9581204.1	22.1075	KAG0359422.1	99.464	RIB06460.1	40.2184	KAF0532437.1	58.308	POG62379.1	16.5682	GES88413.1	16.8812	EGR46188.1	60.1382	CAZ80944.1	157.829	EAA33594.2	85.114	EAS30479.3	15.5579	EGX49324.1	114.978	EAU88437.2	33.7236	QRW19138.1	55.8284	KIS70599.1	54.2935	AFR93706.1
																													POG70314.1	13.6401	GES98765.1	19.6029					EAA35473.3	16.4836			EGX53084.1	315.651
NUDT7_NUDT8			EIE79451.1	6.43437	PHZ07893.1	5.1723	RUO96298.1	4.54242	KAG2178939.1	11.2917	RUS15972.1	5.6323	ORZ02011.1	22.3662	KAF8931259.1	12.354	KAG0347461.1	87.7645	KAG9065148.1	2.31667	KAF9578007.1	1.566	KAG0344496.1	19.8002	RIB19447.1	13.1603	KAF0429797.1	18.379	POG74371.1	7.00701	GES81517.1	13.3643	EGR44108.1	23.8353	CAZ84500.1	27.017	EAA34970.2	60.0683	EAS28854.3	11.6474	EGX49306.1	78.6891	EAU82611.1		QRW17114.1	31.2424	KIS67884.1	62.3051	AFR97487.1
			EIE80135.1	15.6632			RUP19530.1	27.767					ORZ12543.1	10.4083	KAF8933758.1	48.6585			KAG9066643.1	60.3101	KAF9579667.1	16.0874					KAF0483187.1	27.0484	POG75061.1	14.4317	GES90660.1	36.6208											EAU85100.2	1.07765	QRW18045.1	48.3593	KIS71433.1	12.8233
													ORZ28823.1	1.40905																													EAU93504.2	1.20889	QRW18079.1	63.7127
NUDT15	KAF1798712.1	10.5905	EIE80352.1	60.3872	PHZ09677.1	1.54602	RUO96062.1	36.7805	KAG2173815.1	4.80911			ORZ08812.1	13.7258			KAG0357500.1	15.3981	KAG9073177.1	7.44357	KAF9585313.1	33.3861			RIB22969.1	13.7854	KAF0432786.1	17.8343	POG81902.1	21.2794	GES82022.1	59.0705	EGR45637.1	13.3729			EAA36341.1	61.99			EGX53997.1	74.0048					KIS68602.1	161.512
NUDT20	KAF1807402.1	28.9028	EIE88551.1	25.249	PHZ12374.1	10.9828	RUP49114.1	21.9391	KAG2172874.1	32.1001	RUS17982.1	13.7073	ORZ17482.1	57.1788	KAF8931416.1	52.6429	KAG0357456.1	39.7841	KAG9069473.1	50.5625	KAF9579842.1	52.6967	KAG0351876.1	31.1179	RIB03558.1	50.2029	KAF0480805.1	70.5586	POG58563.1	3.5897	GES86312.1	24.0963	EGR52996.1	43.3326	CAZ85301.1	28.8938	EAA33586.2	44.7271	EAS28122.2	15.2179	EGX53773.1	17.5333	EAU93101.2	1.29919	QRW19264.1	51.618	KIS71043.1	60.4263	AFR94159.2
																													POG58564.1	4.30795
IDI1_ID2	KAF1798044.1	117.46	EIE82706.1	125.391	PHZ14998.1	93.9385	RUO97065.1	81.6989	KAG2180992.1	49.4021			ORZ28407.1	81.2529	KAF8925932.1	12.832	KAG0355642.1	17.6552			KAF9586755.1	78.5603	KAG0359950.1	6.94278	RIB15619.1	64.4022	KAF0429917.1	63.4158	POG81329.1	33.6822	GES93528.1	35.7733	EGR51940.1	333.006	CAZ82666.1	259.329	EAA32733.1	59.8865	EAS34882.3	47.2913	EGX53456.1	249.572	EAU93097.1	71.8893			KIS66776.1	104.617	AFR92398.1
			EIE88881.1	133.088
[truncated: 1 more columns]

## Sheet: S7
	Mucoromycota												Mortierellomycota												Glomeromycota								Ascomycota								Basidiomycota
	Mucor lusitanicus MU402		Rhizopus delemar 99-880		Rhizopus microsporus FP469		Jimgerdemannia flammicorona AD002		Umbelopsis isabellina M6-22		Endogone sp. FLAS-F59071		Lobosporangium transversale NRRL 3116		Dissophora ornata		Gamsiella multidivaricata		Linnemannia hyalina		Lunasporangiospora selenospora KOD 1015		Podila minutissima		Gigaspora rosea DAOM 194757		Gigaspora margarita		Rhizophagus irregularis DAOM 197198		Rhizophagus clarus		Trichoderma reesei		Tuber melanosporum		Neurospora crassa		Coccidioides immitis		Orbilia oligospora		Coprinopsis cinerea		Rhizoctonia solani		Ustilago maydis		Cryptococcus neoformans
	protein ID	average TPM	protein ID	average TPM	protein ID	average TPM	protein ID	average TPM	protein ID	average TPM	protein ID	average TPM	protein ID	average TPM	protein ID	average TPM	protein ID	average TPM	protein ID	average TPM	protein ID	average TPM	protein ID	average TPM	protein ID	average TPM	protein ID	average TPM	protein ID	average TPM	protein ID	average TPM	protein ID	average TPM	protein ID	average TPM	protein ID	average TPM	protein ID	average TPM	protein ID	average TPM	protein ID	average TPM	protein ID	average TPM	protein ID	average TPM	protein ID
subfamily_A	KAF1798767.1	34.7369	EIE82761.1	7.97116					KAG2173776.1	2.60467			ORZ00035.1	37.0383	KAF8925828.1	91.8285			KAG9067857.1	132.543	KAF9578311.1	81.1862	KAG0347994.1	36.2946	RIB28018.1	99.0048			POG59931.1	17.224	GES93196.1	66.9537
subfamily_B																									RIB02496.1	8.60089	KAF0383905.1	6.93195			GES75560.1	3.12719	EGR44634.1				EDO65063.1	6.73676
subfamily_C
subfamily_D	KAF1807386.1	32.1226	EIE81380.1	31.5755	PHZ12513.1	55.243	RUP47766.1	49.5571	KAG2177336.1	16.7309			ORZ02061.1	18.3358			KAG0355481.1	29.229	KAG9065156.1	13.9688	KAF9585877.1	26.7167	KAG0354906.1	31.6692	RIB18197.1	31.7632			POG68840.1	12.2126	GES77410.1	16.2369	EGR46282.1	26.2504	CAZ80945.1	51.8763	EDO65364.2	41.7628	EAS30480.3	14.0431	EGX49510.1	63.2017
subfamily_E																	KAG0365582.1	29.6653					KAG0361543.1	14.4626
subfamily_F
subfamily_G			EIE82438.1	12.1589	PHZ14710.1	1.44137	RUP50326.1	32.987	KAG2182450.1	5.22413			ORZ12928.1	39.3272					KAG9069385.1	12.6037													EGR48365.1	125.674	CAZ83499.1	10.9484	ESA44409.1	19.1461	EAS33474.3	16.7238	EGX48493.1	20.288	EAU82378.2	6.98943			KIS67928.1	8.67971
subfamily_H			EIE89246.1	27.5955	PHZ13949.1	34.5644			KAG2174258.1	84.388			ORZ13934.1	15.2512			KAG0352215.1	16.5405	KAG9071908.1	21.7516	KAF9577148.1	2.6257	KAG0356383.1	4.74845	RIB21180.1	27.3797	KAF0514671.1	100.927	POG65960.1	9.49169	GES82818.1	14.0974			CAZ80221.1	37.6523					EGX45672.1	16.0468	EAU93184.2	7.36075	QRW19021.1	68.798	KIS68972.1	44.6143	AFR98060.1
					PHZ16130.1	3.26295			KAG2176205.1	5.37392
subfamily_I																									RIB00718.1	3.00132
																									RIB09059.1	9.40325
																									RIB11048.1	2.72135
																									RIB21056.1	1.39546
																									RIB31001.1	19.1819
																									RIB29441.1	10.2076
																									RIB29429.1	5.52794
																									RIB29361.1	4.68512
																									RIB29006.1	32.7936
																									RIB28958.1	5.80354
																									RIB28161.1	104.741
																									RIB27328.1	9.15219
																									RIB27010.1	3.16384
																									RIB26361.1	11.7725
																									RIB24082.1	4.02263
																									RIB23950.1	9.37708
																									RIB23360.1	1.97678
																									RIB22810.1	6.91877
																									RIB21005.1	10.8187
																									RIB19679.1	11.4896
																									RIB19499.1	1.92544
																									RIB19385.1	5.85475
																									RIB18459.1	2.87459
																									RIB18406.1	1.19128
																									RIB16302.1	14.5532
																									RIB13052.1	4.68114
																									RIB13011.1	5.83672
																									RIB10478.1	12.1841
																									RIB10013.1	4.44222
																									RIB09628.1	5.56254
																									RIB08849.1	6.09776
																									RIB05377.1	4.99981
																									RIB04800.1	4.36457
																									RIB04699.1	2.88255
																									RIB04406.1	1.56559
																									RIB04027.1	4.19131
																									RIB02488.1	22.086
																									RIB01668.1	2.88655
																									RIB01341.1	5.35282
																									RIB00485.1	7.75117
																									RIB01305.1	4.05569
subfamily_J																									RIB25119.1	2.50559
																									RIB09897.1	1.58134
																									RIB19211.1	1.74648
																									RIB12577.1	1.36368
																									RIB00608.1	1.31931
subfamily_K																															GES85710.1	8.33122
subfamily_L
subfamily_M																																	EGR49375.1	10.5512	CAZ84221.1	52.3936	EAA35047.1	2.33957	EAS33128.3	21.9003	EGX45477.1	18.0532	EAU87791.2	8.01257
																																									EGX52087.1	10.1292	EAU88706.1	17.4939
[truncated: 1 more columns]

## Sheet: S8
List of domains homologous to other than NUDIX domain from blastp results for NUDIX proteins from 183 fungal genomes
FAD binding domain PF01494
Aldo/keto reductase domain PF00248
CTP-dependent diacylglycerol kinase
ARID/BRIGHT DNA binding domain PF01388
Glycogen synthatase and transferase
AMP-binding domain PF00501
Ribonucleotide reductase (barrel domain) PF02867
Ribonucleotide reductase (all-alpha domain) PF00317 & ATP cone domain PF03477 & Ribonucleotide reductase (barrel domain) PF02867
SAM domain (Sterile alpha motif) PF07647 & SAM domain (Sterile alpha motif) PF00536
Phosphotransferase enzyme family PF01636
Proton-conducting membrane transporter PF00361
SNARE domain PF05739
Calcineurin-like phosphoesterase PF00149
Amidase PF01425
Alpha/beta hydrolase domain PF20408
PRMT5 arginine-N-methyltransferase PF05185
tRNA synthetases class II (D, K, and N) PF00152 &OB-fold nucleic acid binding domain PF01336
Nucleoporin FG repeat region PF13634
Gram-negative porin PF13609
Nicotinate phosphoribosyltransferase (NAPRTase) PF04095
Zinc finger C-x8-C-x5-C-x3-H type (and similar) PF00642
Initiation factor 2 subunit family PF01008
Zinc knuckle PF00098
